# Supplementary material
Source: PubMed Central journal article supplement (PMC7273316)
Supplement: jama-324-57-s001.pdf [file jama-324-57-s001.pdf]

## Supplementary Online Content

Ferreyro BL, Angriman F, Munshi L, et al. Association of noninvasive oxygenation strategies with all-cause mortality in adults with acute hypoxemic respiratory failure: a systematic review and meta-analysis. *JAMA*. Published online June 4, 2020. doi:10.1001/jama.2020.9524

eAppendix 1. Search Strategies and Eligibility Criteria

eAppendix 2. Further Details on Statistical Analysis

eFigure 1. Initial Pairwise Meta-analysis for All Comparisons

eTable 1. Individual Study Risk of Bias for All-Cause Mortality

eFigure 2. Association of Different Noninvasive Oxygenation Strategies With All-Cause Mortality

eFigure 3. Results of Incoherence Assessment for All-Cause Mortality

eFigure 4. Rank Probabilities for All-Cause Mortality

eTable 2. Summary of Evidence Grading for All Comparison and Primary and Secondary Outcome

eTable 3. Individual Study Risk of Bias for Endotracheal Intubation

eFigure 5. Association of Different Comparisons With Endotracheal Intubation

eFigure 6. Incoherence Assessment for Endotracheal Intubation

eFigure 7. Potential Sources of Incoherence

eFigure 8. Rank Probabilities for Endotracheal Intubation

eFigure 9. Gelman Plots for Model Convergence for All-Cause Mortality

eFigure 10. Gelman Plots for Model Convergence for Endotracheal Intubation

eTable 4. Assessment of Model Fit for Primary and Secondary Outcome

eTable 5. Length of Stay by Treatment Group

eTable 6. Sensitivity Analysis for All-Cause Mortality

eTable 7. Sensitivity Analysis for Endotracheal Intubation

eTable 8. Sensitivity Analysis With Informative Priors for All-Cause Mortality

eTable 9. Sensitivity Analysis With Informative Priors for Intubation

eReferences

This supplementary material has been provided by the authors to give readers additional information about their work.

## eAppendix 1. Search strategy

General description: The following seven electronic bibliographic databases were searched using a comprehensive search strategy developed by an information specialist: (1) *Ovid MEDLINE*, (2) *Ovid EMBASE*, (3) *PubMed (Non-Medline records only)*, (4) *EBM Reviews - Cochrane Central Register of Controlled Trials*, (5) *CINAHL Complete*, (6) *Web of Science*, (7) *LILACS*. We also searched the *ClinicalTrials.gov*, *WHO International Clinical Trials Registry Platform*, and *International Standard Randomized Controlled Trial Number Registry* for all registered clinical trials and randomized controlled trials.

### Search Strategy

The search strategy is structured according to the *Peer Reviewed Electronic Search Strategies (PRESS) 2015 Guidelines* (Refer to Supplementary File 2 for search strategy). All randomized controlled trials were considered if the patient population is > 18 years of age. A validated search filter for randomized controlled trials from the *Cochrane Handbook for Systematic Reviews of Interventions Version 5.1.0, Section 6.4.11*. were used to screen *Ovid MEDLINE*, *EMBASE*, and *PubMed*. A pre-tested search filter for randomized controlled trials from the *Scottish Intercollegiate Guidelines Network* was used to screen *CINAHL Complete* and *Web of Science*. No limits were applied to language, publication year, gender or race.

#### 1) Ovid MEDLINE (Last updated April 28<sup>th</sup>, 2020)

Database: Ovid MEDLINE(R) and Epub Ahead of Print, In-Process & Other Non-Indexed Citations, Daily and Versions(R) <1946 to Present> Search Strategy:

- 
- 1 Respiratory Insufficiency/ or Respiratory Distress Syndrome, Adult/
  - 2 ((respiratory or respiration or lung or ventilatory) adj2 (depress\* or insufficien\* or fail\* or deficien\* or disturb\* or dysfunction\* or compromis\*)).tw,kw,kf.
  - 3 Hypoxia/
  - 4 (acute adj2 (hypoxia or hypox?emi\*)).tw,kw,kf.
  - 5 (acute hypox?emic respiratory failure\* or AHRF or acute respiratory distress syndrome\* or ARDS).tw,kw,kf.
  - 6 Noninvasive ventilation/ or Oxygen inhalation therapy/ or Masks/ or Continuous Positive Airway Pressure/
  - 7 ((non-invasive or non invasive or noninvasive) adj3 (oxygen\* or ventilat\*)).tw,kw,kf.
  - 8 (continuous positive airway pressure or CPAP or continuous positive pressure ventilation or CPPV or bi level positive airway pressure or bilevel positive airway pressure or bi-level positive airway pressure or BiPaP or NIV).tw,kw,kf.
  - 9 standard oxygen.tw,kw,kf.
  - 10 ((low flow or low-flow or lowflow) adj2 oxygen\*).tw,kw,kf.
  - 11 ((mask\* or helmet\*) adj1 (face or oxygen)).tw,kw,kf.
  - 12 (Ambu Res-cue mask\* or Easyfit or Performatrack or Performax or transnasal mask\* or facemask\* or face-mask\*).tw,kw,kf.
  - 13 Cannula/

14 ((high flow or highflow or high-flow) adj1 (nasal cannula\* or oxygen cannula\*)).tw,kw,kf.  
 15 (HFNC or HFOC).tw,kw,kf.  
 16 or/1-5  
 17 or/6-15  
 18 16 and 17  
 19 limit 18 to "all adult (19 plus years)"  
 20 exp animals/ not humans/  
 21 19 not 20  
 22 randomized controlled trial.pt.  
 23 controlled clinical trial.pt.  
 24 randomized.ab.  
 25 placebo.ab.  
 26 drug therapy.fs.  
 27 randomly.ab.  
 28 trial.ab.  
 29 groups.ab.  
 30 or/22-29  
 31 21 and 30

2) Ovid EMBASE (Last updated April 28<sup>th</sup>, 2020)

| Embase Classic+Embase <1947 to 2019 November 22> |                                                                                                                                                              |
|--------------------------------------------------|--------------------------------------------------------------------------------------------------------------------------------------------------------------|
| #                                                | Search Statement                                                                                                                                             |
| 1                                                | respiratory failure/ or acute respiratory failure/ or lung insufficiency/                                                                                    |
| 2                                                | ((respiratory or respiration or lung or ventilatory) adj2 (depress* or insufficien* or fail* or deficien* or disturb* or dysfunction* or compromis*)).tw,kw. |
| 3                                                | (acute hypox?emic respiratory failure* or AHRF or acute respiratory distress syndrome* or ARDS).tw,kw.                                                       |
| 4                                                | hypoxia/                                                                                                                                                     |
| 5                                                | (acute adj2 (hypoxia or hypox?emi*)).tw,kw.                                                                                                                  |
| 6                                                | exp nasal cannula/                                                                                                                                           |
| 7                                                | ((high flow or high-flow or highflow) adj1 (nasal cannula* or oxygen cannula*)).tw,kw.                                                                       |
| 8                                                | (HFNC or HFOC or Optiflow or Opti-flow or Opti flow).tw,kw.                                                                                                  |
| 9                                                | noninvasive ventilation/ or positive end expiratory pressure/                                                                                                |
| 10                                               | ((non-invasive or non invasive or noninvasive) adj3 (oxygen* or ventilat*)).tw,kw.                                                                           |
| 11                                               | (continuous positive airway pressure or CPAP or continuous positive pressure ventilation or                                                                  |

|    |                                                                                                                                                                           |
|----|---------------------------------------------------------------------------------------------------------------------------------------------------------------------------|
|    | CPPV or bi level positive airway pressure or bilevel positive airway pressure or bi-level positive airway pressure or BiPaP or NIV).tw,kw.                                |
| 12 | oxygen therapy/                                                                                                                                                           |
| 13 | standard oxygen.tw,kw.                                                                                                                                                    |
| 14 | ((low flow or low-flow or lowflow) adj2 oxygen*).tw,kw.                                                                                                                   |
| 15 | face mask/                                                                                                                                                                |
| 16 | ((mask* or helmet*) adj1 (face or oxygen)).tw,kw.                                                                                                                         |
| 17 | (Ambu Res-cue mask* or Easyfit or Performatrack or Performax or transnasal mask* or facemask* or face-mask*).tw,kw.                                                       |
| 18 | or/1-5                                                                                                                                                                    |
| 19 | or/6-17                                                                                                                                                                   |
| 20 | 18 and 19                                                                                                                                                                 |
| 21 | limit 20 to (adult <18 to 64 years> or aged <65+ years>)                                                                                                                  |
| 22 | exp animals/ not human/                                                                                                                                                   |
| 23 | 21 not 22                                                                                                                                                                 |
| 24 | crossover-procedure/                                                                                                                                                      |
| 25 | double-blind procedure/                                                                                                                                                   |
| 26 | randomized controlled trial/                                                                                                                                              |
| 27 | single-blind procedure/                                                                                                                                                   |
| 28 | (random* or factorial* or crossover* or cross over* or cross-over* or placebo* or (doubl* adj blind*) or (singl* adj blind*) or assign* or allocat* or volunteer*).tw,kw. |
| 29 | 24 or 25 or 26 or 27 or 28                                                                                                                                                |
| 30 | 23 and 29                                                                                                                                                                 |

3) Cochrane CENTRAL (Last updated April 28<sup>th</sup>, 2020)

Database: EBM Reviews - Cochrane Central Register of Controlled Trials <November 2019>

Search Strategy:

- 
- 1 respiratory distress syndrome, adult/ or respiratory insufficiency/
  - 2 ((respiratory or respiration or lung or ventilatory) adj2 (depress\* or insufficien\* or fail\* or deficien\* or disturb\* or dysfunction\* or compromis\*)).tw,kw.
  - 3 (acute hypox?emic respiratory failure\* or AHRF or acute respiratory distress syndrome\* or ARDS).tw,kw.
  - 4 Anoxia/
  - 5 (acute adj2 (hypoxia or hypox?emi\*)).tw,kw.
  - 6 noninvasive ventilation/
  - 7 oxygen inhalation therapy/
  - 8 masks/
  - 9 continuous positive airway pressure/
  - 10 ((non-invasive or non invasive or noninvasive) adj3 (oxygen\* or ventilat\*)).tw,kw.
  - 11 standard oxygen.tw,kw.
  - 12 ((low flow or low-flow or lowflow) adj2 oxygen\*).tw,kw.
  - 13 ((mask\* or helmet\*) adj1 (face or oxygen)).tw,kw.
  - 14 (Ambu Res-cue mask\* or Easyfit or Performatrack or Performax or transnasal mask\* or facemask\* or face-mask\*).tw,kw.
  - 15 catheters/
  - 16 ((high flow or high-flow or highflow) adj1 (nasal cannula\* or oxygen cannula\*)).tw,kw.
  - 17 (HFNC or HFOC or Optiflow or Opti-flow or Opti flow).tw,kw.
  - 18 (continuous positive airway pressure or CPAP or continuous positive pressure ventilation or CPPV or bi level positive airway pressure or bilevel positive airway pressure or bi-level positive airway pressure or BiPaP or NIV).tw,kw.
  - 19 or/1-5
  - 20 or/6-18
  - 21 19 and 20
  - 22 exp animals/ not human/
  - 23 21 not 22

4) EBSCO CINAHL Complete (Last updated April 28<sup>th</sup>, 2020)

| #   | Query                                                                                                                                                                                                                                            |
|-----|--------------------------------------------------------------------------------------------------------------------------------------------------------------------------------------------------------------------------------------------------|
| S30 | S17 AND S29                                                                                                                                                                                                                                      |
| S29 | S18 OR S19 OR S20 OR S21 OR S22 OR S23 OR S24 OR S25 OR S26 OR S27 OR S28                                                                                                                                                                        |
| S28 | TX allocat* random*                                                                                                                                                                                                                              |
| S27 | (MH "Quantitative Studies")                                                                                                                                                                                                                      |
| S26 | (MH "Placebos")                                                                                                                                                                                                                                  |
| S25 | TX placebo*                                                                                                                                                                                                                                      |
| S24 | TX random* allocat*                                                                                                                                                                                                                              |
| S23 | (MH "Random Assignment")                                                                                                                                                                                                                         |
| S22 | TX randomi* control* trial*                                                                                                                                                                                                                      |
| S21 | TX ( ( (trebl* n1 blind*) or (trebl* n1 mask*) ) ) OR TX ( ( (tripl* n1 blind*) or (tripl* n1 mask*) ) ) OR TX ( ( (doubl* n1 blind*) or (doubl* n1 mask*) ) ) OR TX ( ( (singl* n1 blind*) or (singl* n1 mask*) ) )                             |
| S20 | TX clinic* N1 trial*                                                                                                                                                                                                                             |
| S19 | PT Clinical trial                                                                                                                                                                                                                                |
| S18 | (MH "Clinical Trials+")                                                                                                                                                                                                                          |
| S17 | S15 AND S16                                                                                                                                                                                                                                      |
| S16 | S5 OR S6 OR S7 OR S8 OR S9 OR S10 OR S11 OR S12 OR S13 OR S14                                                                                                                                                                                    |
| S15 | S1 OR S2 OR S3 OR S4                                                                                                                                                                                                                             |
| S14 | TI ( HFNC or HFOC or Optiflow or Opti-flow or "Opti flow" ) OR AB ( HFNC or HFOC or Optiflow or Opti-flow or "Opti flow" )                                                                                                                       |
| S13 | TI ( ("high flow" or highflow or high-flow) N1 (nasal cannula* or oxygen cannula*) ) OR AB ( ("high flow" or highflow or high-flow) N1 (nasal cannula* or oxygen cannula*) )                                                                     |
| S12 | (MH "Nasal Cannula")                                                                                                                                                                                                                             |
| S11 | TI ( ("Ambu Res-cue mask*" or Easyfit or Performatrack or Performax or "transnasal mask*" or facemask* or face-mask* ) OR AB ( ("Ambu Res-cue mask*" or Easyfit or Performatrack or Performax or "transnasal mask*" or facemask* or face-mask* ) |
| S10 | TI ( ((mask* or helmet*) N1 (face or oxygen)) ) OR AB ( ((mask* or helmet*) N1 (face or oxygen)) )                                                                                                                                               |
| S9  | (MH "Oxygen Masks+")                                                                                                                                                                                                                             |
| S8  | TI ( ("low flow" or low-flow or lowflow) N2 oxygen ) OR AB ( ("low flow" or low-flow or lowflow) N2 oxygen )                                                                                                                                     |
| S7  | TI ("standard oxygen" or "standard O2") OR AB ("standard oxygen" or "standard O2")                                                                                                                                                               |
| S6  | TI ( ("continuous positive airway pressure" or CPAP or "continuous positive pressure ventilation" or CPPV or "bi level positive airway pressure" or "bilevel                                                                                     |

|    |                                                                                                                                                                                                                                                                                                                                       |
|----|---------------------------------------------------------------------------------------------------------------------------------------------------------------------------------------------------------------------------------------------------------------------------------------------------------------------------------------|
|    | positive airway pressure" or "bi-level positive airway pressure" or BiPaP or NIV ) OR AB ( ("continuous positive airway pressure" or CPAP or "continuous positive pressure ventilation" or CPPV or "bi level positive airway pressure" or "bilevel positive airway pressure" or "bi-level positive airway pressure" or BiPaP or NIV ) |
| S5 | (MH "Oxygen Therapy+") OR (MH "Continuous Positive Airway Pressure")                                                                                                                                                                                                                                                                  |
| S4 | TI ( ("acute hypox?emic respiratory failure*" or AHRF or "acute respiratory distress syndrome*" or ARDS) ) OR AB ( ("acute hypox?emic respiratory failure*" or AHRF or "acute respiratory distress syndrome*" or ARDS) )                                                                                                              |
| S3 | TI ( (acute N2 (hypoxia or hyox?emi*)) ) OR AB ( (acute N2 (hypoxia or hyox?emi*)) )                                                                                                                                                                                                                                                  |
| S2 | TI ( ((respiratory or respiration or lung or ventilatory) N2 (depress* or insufficien* or fail* or deficien* or disturb* or dysfunction* or compromis*)) ) OR AB ( ((respiratory or respiration or lung or ventilatory) N2 (depress* or insufficien* or fail* or deficien* or disturb* or dysfunction* or compromis*)) )              |
| S1 | (MH "Respiratory Distress Syndrome, Acute") OR (MH "Respiratory Failure")                                                                                                                                                                                                                                                             |

5) Web of Science (Last updated April 28<sup>th</sup>, 2020)

|      |                                                                                                                                                                                                                                                                                                                                                                                                           |
|------|-----------------------------------------------------------------------------------------------------------------------------------------------------------------------------------------------------------------------------------------------------------------------------------------------------------------------------------------------------------------------------------------------------------|
| # 15 | #13 NOT #14                                                                                                                                                                                                                                                                                                                                                                                               |
| # 14 | TOPIC: (infant* or child* or neonat* or NICU* or newborn* or (newly NEAR/1 born) or premature or pre-mature or "low birth weight" or VLBW or LBW)                                                                                                                                                                                                                                                         |
| # 13 | #12 AND #11                                                                                                                                                                                                                                                                                                                                                                                               |
| # 12 | TOPIC: (clinical NEAR/1 trial*) OR TOPIC: ((trebl* NEAR/1 blind*) or (trebl* NEAR/1 mask*)) OR TOPIC: ((tripl* NEAR/1 blind*) or (tripl* NEAR/1 mask*)) OR TOPIC: ((doubl* NEAR/1 blind*) or (doubl* NEAR/1 mask*)) OR TOPIC: ((singl* NEAR/1 blind*) or (singl* NEAR/1 mask*)) OR TOPIC: ("randomi* control* trial*") OR TOPIC: ("random* allocat*") OR TOPIC: (placebo*) OR TOPIC: ("allocat* random*") |
| # 11 | #10 AND #1                                                                                                                                                                                                                                                                                                                                                                                                |
| # 10 | #9 OR #8 OR #7 OR #6 OR #5 OR #4 OR #3 OR #2                                                                                                                                                                                                                                                                                                                                                              |
| # 9  | TOPIC: (HFNC or HFOC or Optiflow or Opti-flow or "Opti flow")                                                                                                                                                                                                                                                                                                                                             |
| # 8  | TOPIC: (((("high flow" or highflow or high-flow) NEAR/1 ("nasal cannula*" or "oxygen cannula*"))))                                                                                                                                                                                                                                                                                                        |
| # 7  | TOPIC: ("Ambu Res-cue mask*" or Easyfit or Performatrack or Performax or "transnasal mask*" or facemask* or face-mask*)                                                                                                                                                                                                                                                                                   |
| # 6  | TOPIC: (((mask* or helmet*) NEAR/1 (face or oxygen)))                                                                                                                                                                                                                                                                                                                                                     |
| # 5  | TOPIC: (("low flow" or low-flow or lowflow) NEAR/2 oxygen*)                                                                                                                                                                                                                                                                                                                                               |
| # 4  | TOPIC: ("standard oxygen")                                                                                                                                                                                                                                                                                                                                                                                |
| # 3  | TOPIC: (("continuous positive airway pressure" or CPAP or "continuous positive pressure ventilation" or CPPV or "bi level positive airway pressure" or "bilevel positive airway pressure" or "bi-level positive airway pressure" or BiPaP or NIV))                                                                                                                                                        |

|     |                                                                                                                                                                                                                                                                                                                                 |
|-----|---------------------------------------------------------------------------------------------------------------------------------------------------------------------------------------------------------------------------------------------------------------------------------------------------------------------------------|
| # 2 | TOPIC: (oxygen* NEAR/3 (non-invasive or "non invasive" or noninvasive)) OR TOPIC: (ventilat* NEAR/3 (non-invasive or "non invasive" or noninvasive))                                                                                                                                                                            |
| # 1 | TOPIC: (((respiratory or respiration or lung or ventilatory) NEAR/2 (depress* or insufficien* or fail* or deficien* or disturb* or dysfunction* or compromis*))) OR TOPIC: ((acute NEAR/2 (hypoxia or hypox?emi*))) OR TOPIC: ((acute hypox?emic respiratory failure* or AHRF or acute respiratory distress syndrome* or ARDS)) |

6) PubMed (Last updated April 28<sup>th</sup>, 2020)

((((((((((respiratory insufficiency[MeSH Terms]) OR respiratory distress syndrome, adult[MeSH Terms]) OR (((((((respiratory depress\*[Title/Abstract] OR respiration depress\*[Title/Abstract] OR lung depress\*[Title/Abstract] OR ventilatory depress\*[Title/Abstract])) OR (respiratory insufficien\*[Title/Abstract] OR respiration insufficien\*[Title/Abstract] OR lung insufficien\*[Title/Abstract] OR ventilatory insufficien\*[Title/Abstract])) OR (respiratory fail\*[Title/Abstract] OR respiration fail\*[Title/Abstract] OR lung fail\*[Title/Abstract] OR ventilatory fail\*[Title/Abstract])) OR (respiratory deficien\*[Title/Abstract] OR respiration deficien\*[Title/Abstract] OR lung deficien\*[Title/Abstract] OR ventilatory deficien\*[Title/Abstract])) OR (respiratory disturb\*[Title/Abstract] OR respiration disturb\*[Title/Abstract] OR lung disturb\*[Title/Abstract] OR ventilatory disturb\*[Title/Abstract])) OR (respiratory dysfunction\*[Title/Abstract] OR respiration dysfunction\*[Title/Abstract] OR lung dysfunction\*[Title/Abstract] OR ventilatory dysfunction\*[Title/Abstract])) OR (respiratory compromis\*[Title/Abstract] OR respiration compromis\*[Title/Abstract] OR lung compromis\*[Title/Abstract] OR ventilatory compromis\*[Title/Abstract])))) OR hypoxia[MeSH Terms]) OR "acute hypoxia"[Title/Abstract]) OR (("acute hypoxemia"[Title/Abstract] OR "acute hypoxemic"[Title/Abstract] OR "acute hypoxaemia"[Title/Abstract] OR "acute hypoxaemic"[Title/Abstract])))) AND (((((((((((positive pressure ventilation, non invasive[MeSH Terms]) OR oxygen inhalation therapy[MeSH Terms]) OR masks[MeSH Terms]) OR continuous positive airway pressure[MeSH Terms]) OR ((NIV[Title/Abstract] OR "non-invasive oxygenation"[Title/Abstract] OR "non invasive oxygenation"[Title/Abstract] OR "noninvasive oxygenation"[Title/Abstract] OR "non-invasive ventilation"[Title/Abstract] OR "non invasive ventilation"[Title/Abstract] OR "noninvasive ventilation"[Title/Abstract])) OR (("continuous positive airway pressure"[Title/Abstract] OR CPAP[Title/Abstract] OR "continuous positive pressure ventilation"[Title/Abstract] OR CPPV[Title/Abstract] OR "bi level positive airway pressure"[Title/Abstract] OR "bilevel positive airway pressure"[Title/Abstract] OR "bi-level positive airway pressure"[Title/Abstract] OR BiPaP[Title/Abstract])))) OR "standard oxygen"[Title/Abstract]) OR ((low flow oxygen\*[Title/Abstract] OR low-flow oxygen\*[Title/Abstract] OR low flow oxygen\*[Title/Abstract])))) OR ((face mask\*[Title/Abstract] OR oxygen mask\*[Title/Abstract] OR face helmet\*[Title/Abstract] OR oxygen helmet\*[Title/Abstract])) OR ((ambu res-cue mask\*[Title/Abstract] OR Easyfit[Title/Abstract] OR Performatrack[Title/Abstract] OR Performax[Title/Abstract] OR transnasal mask\*[Title/Abstract] OR facemask\*[Title/Abstract] OR face-mask\*[Title/Abstract])))) OR cannula[MeSH Terms]) OR



((high flow nasal cannula\*[Title/Abstract] OR high flow nasal cannula\*[Title/Abstract] OR high-flow nasal cannula\*[Title/Abstract] OR high flow oxygen cannula\*[Title/Abstract] OR high-flow oxygen cannula\*[Title/Abstract])) OR ((HFNC[Title/Abstract] OR HFOC[Title/Abstract] OR Optiflow[Title/Abstract] OR Optiflow[Title/Abstract] OR "Opti flow"[Title/Abstract])) AND (pubmednotmedline[sb] OR publisher[sb] OR inprocess[sb])) AND (((((randomized controlled trial [pt] or controlled clinical trial [pt] or randomized [tiab] or placebo [tiab] or drug therapy [sh] or randomly [tiab] or trial [tiab] or groups [tiab]))) NOT (((animals [mh] NOT humans [mh])))))

## Eligibility Criteria for Studies

| Inclusion Criteria                                                                                                                                                                                                                                                                                                                                                                                                                                                                                                                                                                                                                                                                                                                                                                                                                                                                                                                             | Exclusion Criteria                                                                                                                                                                                                                                                                                                                                                                                                                                                                                                                                                                                                                                                                                                                            |
|------------------------------------------------------------------------------------------------------------------------------------------------------------------------------------------------------------------------------------------------------------------------------------------------------------------------------------------------------------------------------------------------------------------------------------------------------------------------------------------------------------------------------------------------------------------------------------------------------------------------------------------------------------------------------------------------------------------------------------------------------------------------------------------------------------------------------------------------------------------------------------------------------------------------------------------------|-----------------------------------------------------------------------------------------------------------------------------------------------------------------------------------------------------------------------------------------------------------------------------------------------------------------------------------------------------------------------------------------------------------------------------------------------------------------------------------------------------------------------------------------------------------------------------------------------------------------------------------------------------------------------------------------------------------------------------------------------|
| <ul style="list-style-type: none"> <li>▪ Study design               <ul style="list-style-type: none"> <li>○ Randomized clinical trial</li> </ul> </li> <li>▪ Age of patients in study &gt; 18 years</li> <li>▪ Acute hypoxemic respiratory failure               <ul style="list-style-type: none"> <li>○ New onset (&lt; 7 days)</li> <li>○ Clinical signs (tachypnea, increased work of breathing)</li> <li>○ Radiologic signs (unilateral or bilateral x-ray opacities)</li> <li>○ Gas exchange alterations (hypoxemia or requirement of supplemental oxygen)</li> </ul> </li> <li>▪ Setting: ICU, High Dependency Unit, Emergency Department.</li> <li>▪ Interventions assessed               <ul style="list-style-type: none"> <li>○ High flow nasal oxygen</li> <li>○ Noninvasive ventilation (oronasal or helmet interface)</li> <li>○ Standard oxygen therapy</li> </ul> </li> <li>▪ Mortality and/or intubation assessed</li> </ul> | <ul style="list-style-type: none"> <li>▪ Study design               <ul style="list-style-type: none"> <li>○ Observational cohort studies, case control studies.</li> <li>○ Cross-over randomized controlled studies</li> </ul> </li> <li>▪ Study participants               <ul style="list-style-type: none"> <li>○ 50% or more of the included patients have AE-COPD or CHF</li> <li>○ Patients with respiratory failure immediately post extubation</li> <li>○ Post-extubation after major cardiovascular/thoracic surgery</li> </ul> </li> <li>▪ No relevant intervention or outcomes               <ul style="list-style-type: none"> <li>○ Both mortality and intubation not reported</li> </ul> </li> <li>▪ Animal studies</li> </ul> |

AE-COPD: acute exacerbation of chronic obstructive pulmonary disease; CHF: congestive heart failure; ICU: intensive care unit.

## eAppendix 2. Statistical Analysis

This network meta-analysis was conducted using Bayesian random effects models to derive head-to-head treatment effect estimates comparing all interventions. Main analyses were based on Markov chain Monte Carlo methods using minimally informative prior distribution for treatment effect estimates, and informative prior distributions for heterogeneity estimates derived from external evidence for each of the study outcomes. Specifically, we fitted generalized linear models with a log-link function and a binomial likelihood, with 3 chains, 70000 iterated simulations plus 20000 iterations used for the burn-in period. This was done via the `gemtc` package available in R which is based on the models proposed by Dias.<sup>1,2</sup> Correction of the treatment associations for multi-arm trials was applied.<sup>3</sup> Model convergence was assessed by means of the Brooks-Gelman-Rubin diagnostic plots. The goodness-of-fit of our final models<sup>4</sup> was assessed by the use of deviance, leverage and deviance information criterion. Also, we compared the mean residual deviance with the number of contributing data points. Pairwise and network risk ratios (RR) with corresponding 95% credible intervals (CIs) were derived using the median and the 2.5th and 97.5th percentile of the posterior distribution respectively. In addition to relative associations, Bayesian analyses were used to produce absolute risk differences and 95% CIs between treatment groups. For these, we assumed an incidence of 30% (mortality) and 40% (intubation) in the standard oxygen group, based on pooled data and from previous literature.<sup>5,6</sup> To take into consideration the uncertainty about this assumption, we sampled the log control group risk for mortality from a normal distribution with mean -1.2039728 and variance 0.1, and for intubation from a normal distribution with mean -.91629073 and variance 0.1. The sampled

log control group risks were then exponentiated and used to derive risk differences from pooled relative risks generated by the network meta-analysis for each outcome.

We calculated the median and the 95% credible intervals of the posterior distribution for the rank of each treatment. We chose to use this approach as it explicitly shows the uncertainty regarding the ranking of interventions. An intervention with a median rank of 1 would be interpreted as having the most beneficial effect.<sup>7</sup> Heterogeneity in treatment effects between studies was quantified using the posterior distribution of  $\tau^2$  alongside 95% credible intervals. Incoherence between direct and indirect comparisons was estimated using the node-splitting approach contrasting estimates from both direct and indirect evidence.<sup>8,9</sup>

#### Use of informative priors

##### *For heterogeneity*

For all-cause mortality, the parameters of the predictive log-normal distribution for heterogeneity used as prior information were  $\mu=-3.50$  and  $\sigma=1.26$ . For endotracheal intubation (device related success/failure) the parameters were  $\mu=-1.69$  and  $\sigma=1.68$ .  $\mu$  and  $\sigma$  are the mean and standard deviation on the log scale, respectively. The intervention comparison type considered was non-pharmacological versus non-pharmacological.<sup>7</sup> These distributions have been suggested by empirical evidence from previous literature and account for the nature of each of these outcomes.<sup>10</sup> It should be noted that the informative prior distributions for heterogeneity were derived from Turner et al for meta-analyses conducted in the log-odds scale, and our meta-analyses are conducted in the log-relative risk scale. To our knowledge, there are no established prior distributions for heterogeneity for meta-analyses based on the log-relative

risk scale. The expectation is that the prior distributions proposed by Turner et al are wide enough to cover plausible values for both scales. Furthermore, if the event is common (i.e.: more than 10%) the OR tends to be more extreme than the RR. One could thus argue that a prior based on the log OR is conservative (i.e. tends to assume larger heterogeneity) if used for a log RR analysis. Finally, to test the robustness of our analysis, we also conducted a sensitivity analysis using vague priors for the between-trial standard deviation of log-relative risk.

#### *For treatment effects*

As further sensitivity analyses, we used previous literature in order to modify the priors of effect estimates using skeptical priors for the effect of face mask non-invasive ventilation versus standard oxygen and optimistic priors for the effect of high flow nasal oxygen versus face mask noninvasive ventilation. We performed this sensitivity analysis to better account for a subgroup of clinicians who may have greater confidence in high flow nasal cannula in comparison to face mask noninvasive ventilation. We defined priors based on a combination of 1) relative effect estimates for comparisons between face mask noninvasive ventilation and standard oxygen in a large observational study (skeptical, Bellani, 2016<sup>5</sup>), 2) a randomized clinical trial comparing high flow nasal oxygen with noninvasive ventilation (optimistic, Frat, 2015<sup>6</sup>) and 3) a previous study using a Bayesian approach to estimate the effectiveness of therapies in patients with acute respiratory failure (Goligher, 2018<sup>11</sup>). To incorporate such priors into the gemtc analysis, we directly modified the JAGS code including the prior distribution for the effects of interest (face-mask noninvasive ventilation vs. high flow nasal cannula and SOT) as a normal distribution defined by the median log(RR) and the corresponding precision for strongly

enthusiastic or skeptical priors (following the work in Goligher, 2018<sup>11</sup>). Specifically, the median RR for the facemask / standard oxygen contrast was 1.5 and for the facemask / high flow was 1.6. For both distributions we assumed a SD for the  $\ln(\text{RR})$  of 0.25.

We performed all analyses in R v3.6 (packages `gemtc`, `coda`, `pcnetmeta` and `rjags`) using Just Another Gibbs Sampler (JAGS) version 4.3.0 and OpenBUGS.

**eFigure 1. Initial pairwise meta-analysis for all comparisons**  
**Comparison 1 – Face mask non-invasive ventilation vs. standard oxygen.**

Mortality

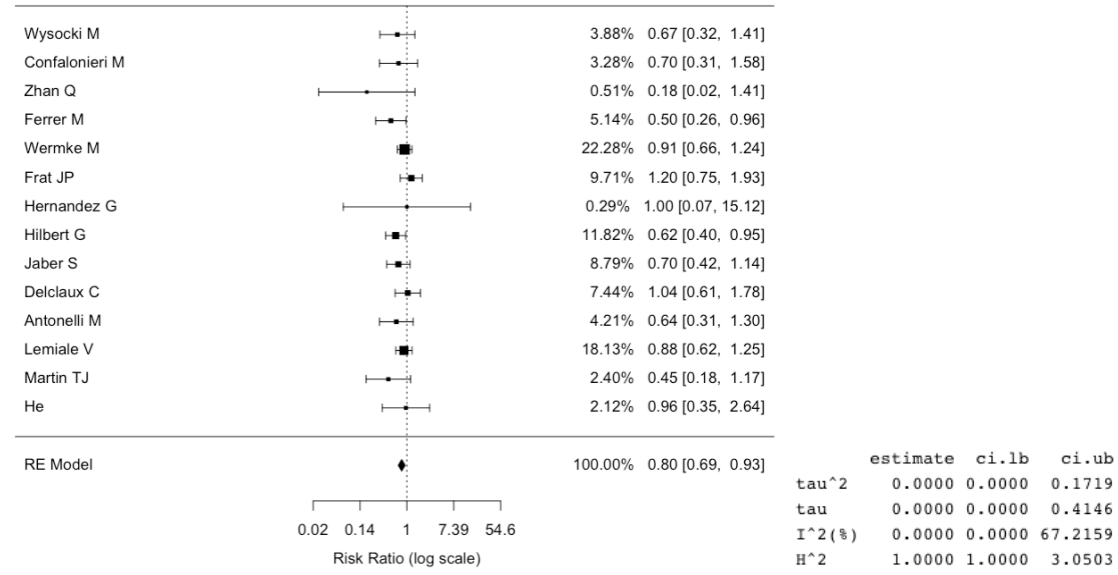

Intubation

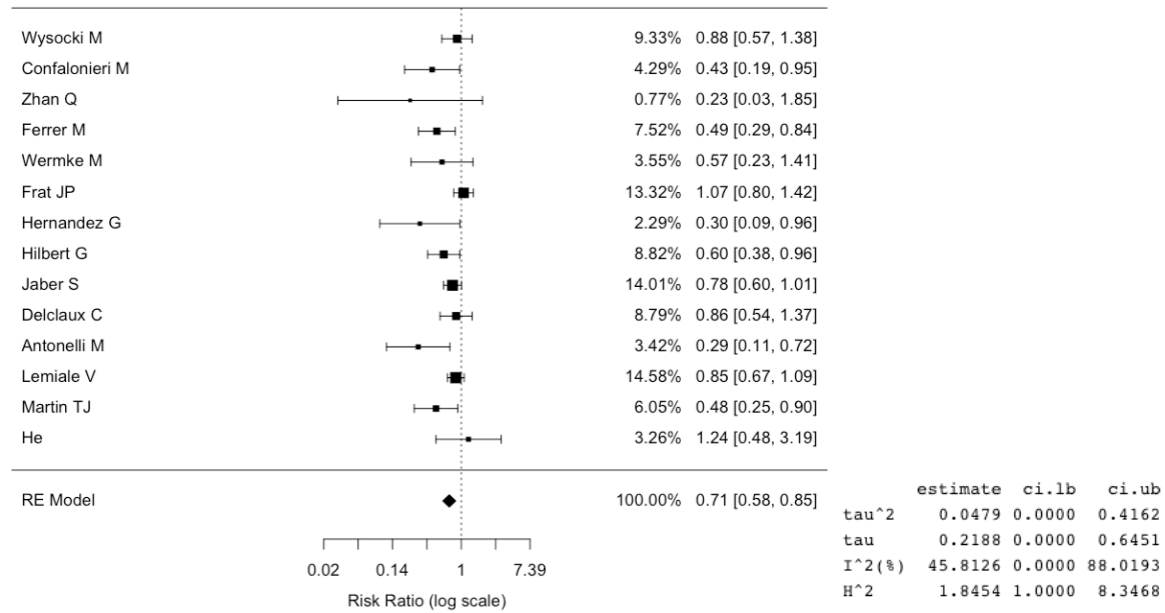

## Comparison 2 – High flow nasal oxygen vs. standard oxygen

### Mortality

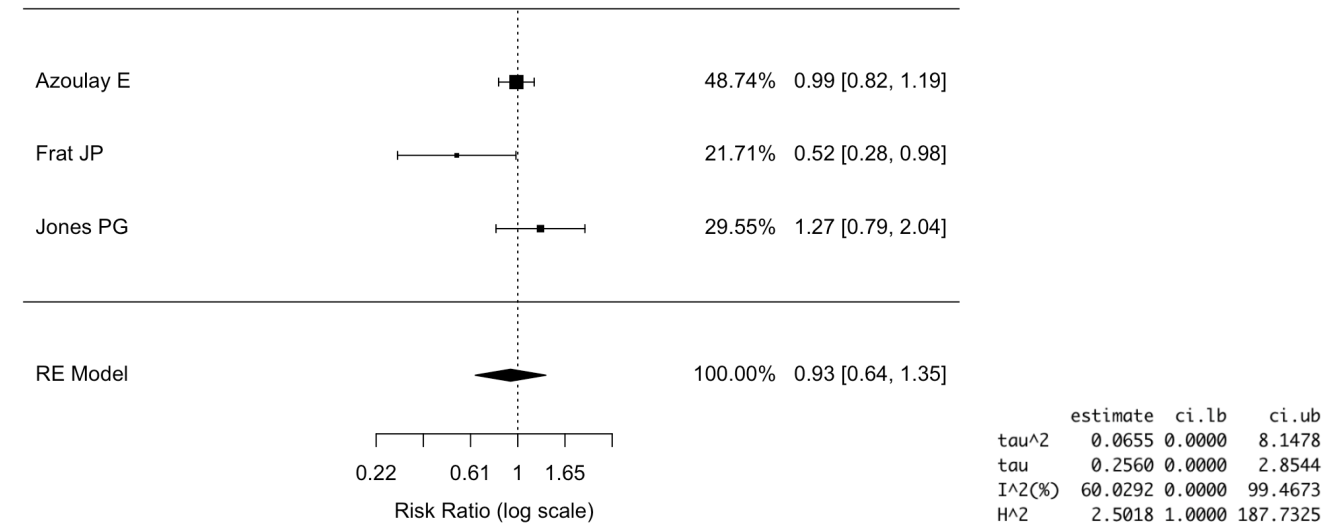

### Intubation

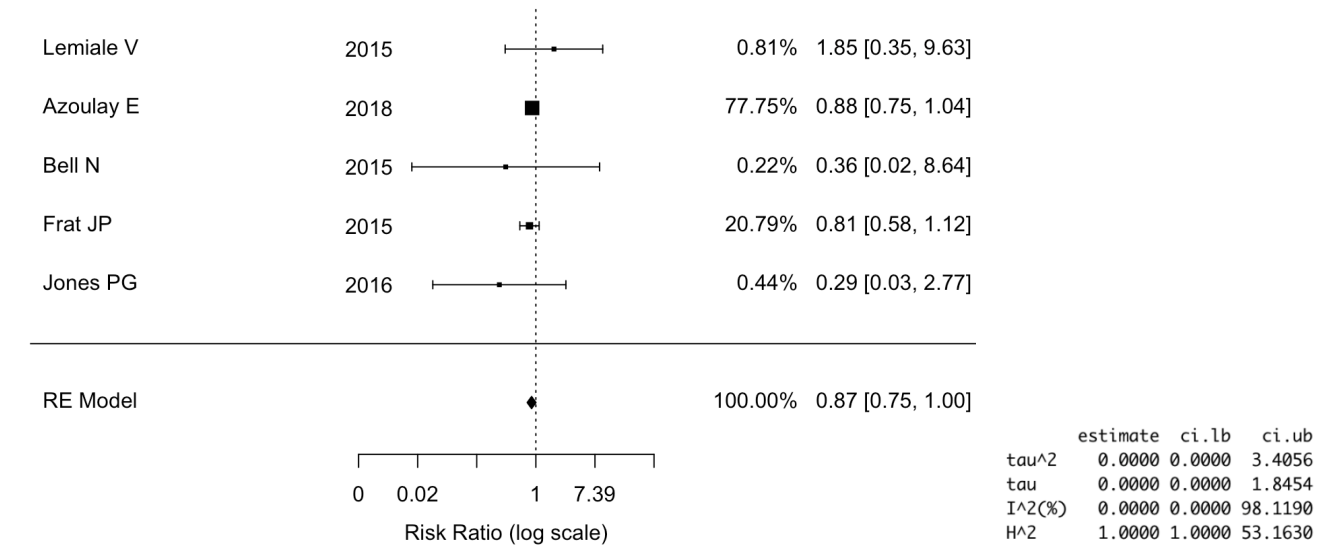



### Comparison 3 – Helmet non-invasive ventilation vs. standard oxygen

#### Mortality

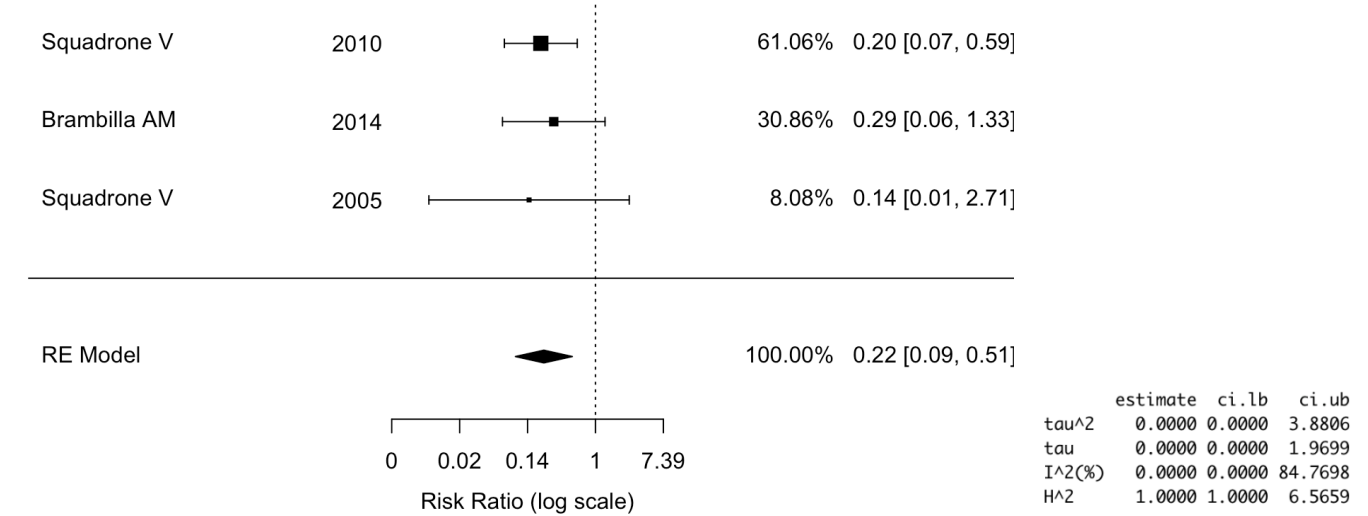

#### Intubation

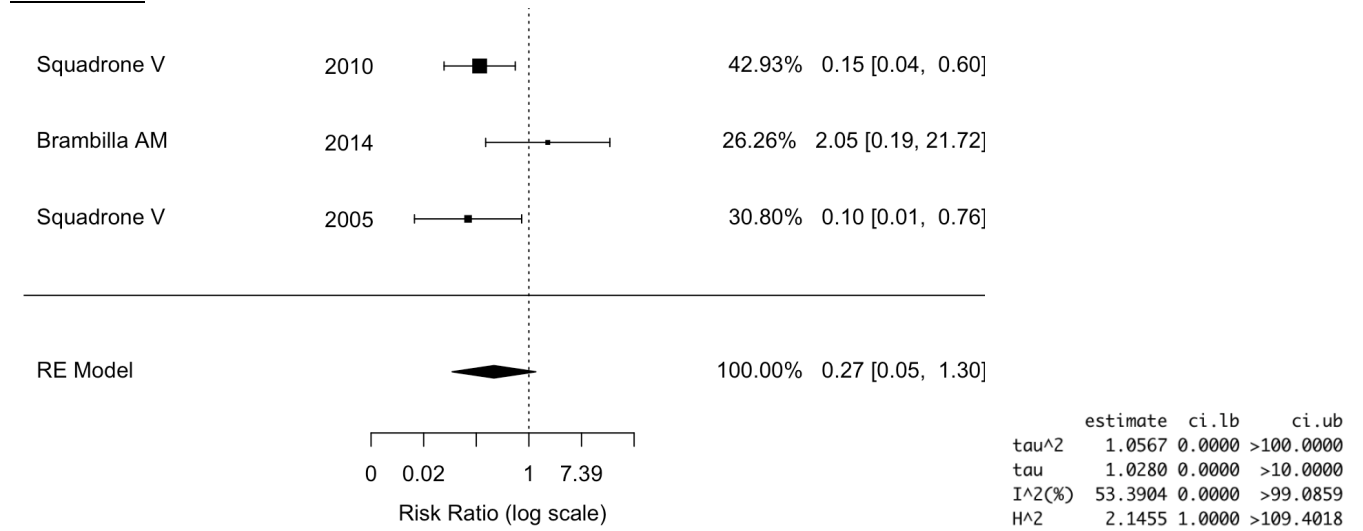

## Comparison 4 – High flow nasal oxygen vs. face mask non-invasive ventilation<sup>1</sup>

### Mortality

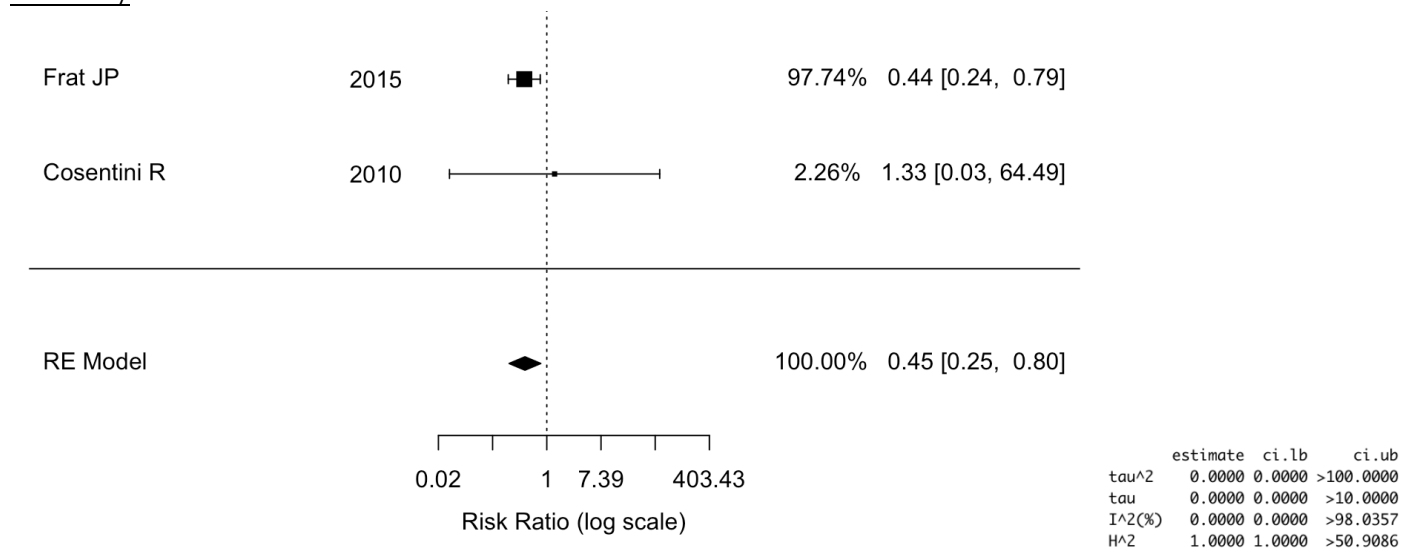

### Intubation

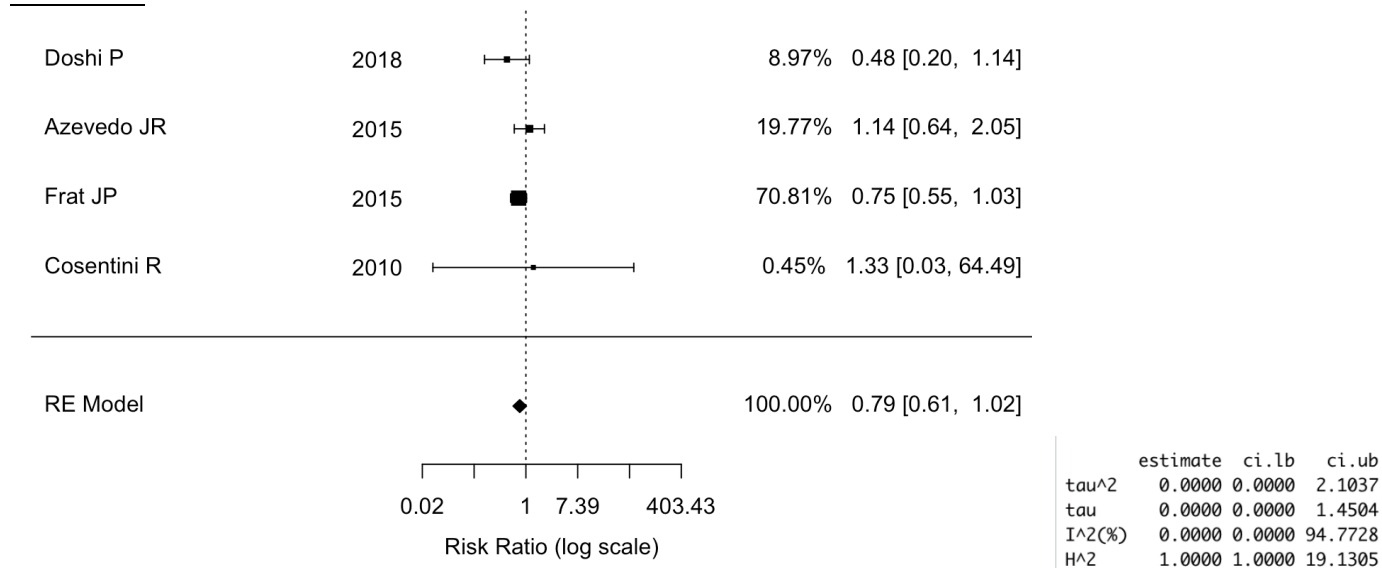

1. The study by Cosentini included by adding 0.5 to the 0 events in both groups. This study was not included in the network meta-analysis.

## Comparison 5 – Helmet non-invasive ventilation vs. face mask non-invasive ventilation

### Mortality

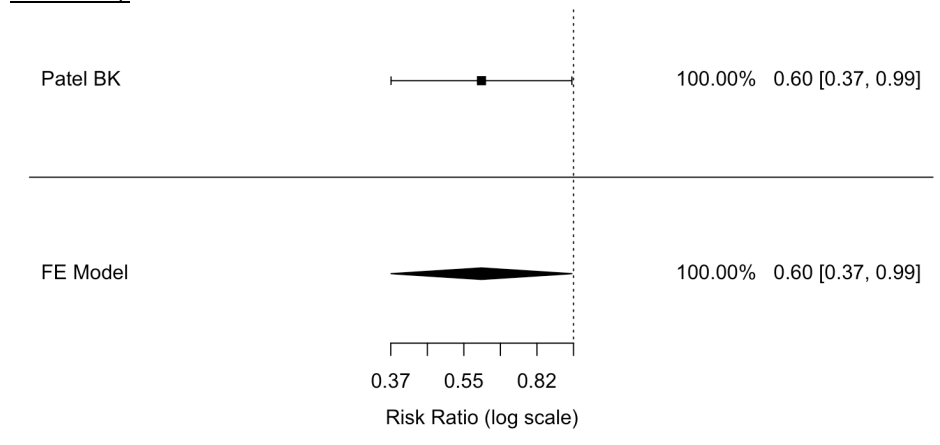

### Intubation

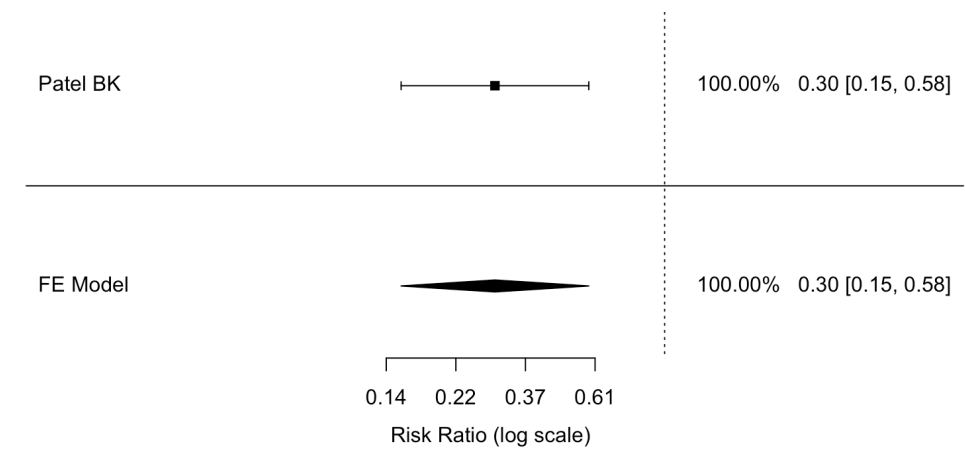

**eTable 1.** Individual study risk of bias for all-cause mortality

| Name (year)         | Randomization generation | Allocation concealment | Blinding | Incomplete data | Selective reporting | Other | Overall risk of bias |
|---------------------|--------------------------|------------------------|----------|-----------------|---------------------|-------|----------------------|
| Wysocki (1995)      | LOW                      | LOW                    | PL       | LOW             | LOW                 | LOW   | LOW                  |
| Confalonieri (1999) | LOW                      | LOW                    | PL       | LOW             | LOW                 | LOW   | LOW                  |
| Squadrone (2010)    | LOW                      | LOW                    | PL       | LOW             | LOW                 | LOW   | LOW                  |
| Brambilla (2014)    | PL                       | PL                     | PL       | LOW             | LOW                 | LOW   | UNCLEAR              |
| Zhan (2012)         | LOW                      | LOW                    | PL       | LOW             | LOW                 | LOW   | LOW                  |
| Ferrer (1999)       | LOW                      | LOW                    | PL       | LOW             | LOW                 | LOW   | LOW                  |
| Azoulay (2018)      | LOW                      | LOW                    | PL       | LOW             | LOW                 | LOW   | LOW                  |
| Wermcke (2011)      | LOW                      | LOW                    | PL       | PL              | LOW                 | LOW   | UNCLEAR              |
| Frat (2015)         | LOW                      | LOW                    | PL       | LOW             | LOW                 | LOW   | LOW                  |
| Hernandez (2010)    | LOW                      | LOW                    | PL       | LOW             | LOW                 | LOW   | LOW                  |
| Hilbert (2001)      | LOW                      | LOW                    | PL       | LOW             | LOW                 | LOW   | LOW                  |
| Jaber (2016)        | LOW                      | LOW                    | PL       | LOW             | LOW                 | LOW   | LOW                  |
| Delclaux (2000)     | LOW                      | LOW                    | PL       | LOW             | LOW                 | LOW   | LOW                  |
| Squadrone (2005)    | LOW                      | LOW                    | PL       | LOW             | LOW                 | LOW   | LOW                  |
| Antonelli (2000)    | LOW                      | LOW                    | PL       | LOW             | LOW                 | LOW   | LOW                  |
| Jones (2016)        | LOW                      | LOW                    | PL       | PH              | LOW                 | LOW   | HIGH                 |
| Lemiale (2015)      | LOW                      | LOW                    | PL       | LOW             | LOW                 | LOW   | LOW                  |
| Martin (2000)       | PL                       | PL                     | PL       | LOW             | LOW                 | LOW   | UNCLEAR              |
| Cosentini (2010)    | LOW                      | LOW                    | UNCLEAR  | LOW             | LOW                 | LOW   | LOW                  |
| Patel (2016)        | LOW                      | LOW                    | PL       | LOW             | LOW                 | LOW   | LOW                  |
| He (2019)           | LOW                      | LOW                    | PL       | LOW             | HIGH                | LOW   | HIGH                 |

PL: probably low, PH: probably high

**eFigure 2.** Estimated association of different noninvasive oxygenation strategies with all-cause mortality (overall and all comparisons)

| Comparison                                 | Network Relative Risk (95% Credible Interval) | Network Risk difference (95% Credible Interval) | Number of trials and participants in direct comparison | Quality of Evidence <sup>a</sup> |
|--------------------------------------------|-----------------------------------------------|-------------------------------------------------|--------------------------------------------------------|----------------------------------|
| Helmet vs. Standard Oxygen                 | 0.40 (0.24 – 0.63)                            | -0.19 (-0.37 to -0.09)                          | 3 trials, 330 patients                                 | Low                              |
| Face mask vs. Standard Oxygen              | 0.83 (0.68 – 0.99)                            | -0.06 (-0.15 to -0.01)                          | 14 trials, 1725 patients                               | Moderate                         |
| High-flow nasal oxygen vs. Standard Oxygen | 0.87 (0.62 – 1.15)                            | -0.04 (-0.15 to 0.04)                           | 3 trials, 1279 patients                                | Moderate                         |
| Helmet vs. High-flow nasal oxygen          | 0.46 (0.26 – 0.80)                            | -0.15 (-0.34 to -0.05)                          | No head to head comparison                             | Low                              |
| Helmet vs. Face Mask                       | 0.48 (0.29 – 0.76)                            | -0.13 (-0.27 to -0.05)                          | 1 trial, 83 patients                                   | Low                              |
| Face mask vs. High-flow nasal oxygen       | 0.95 (0.69 – 1.37)                            | -0.02 (-0.14 to 0.07)                           | 1 trial, 216 patients                                  | Low                              |

a. Based on GRADE criteria

Tau: 0.17 (95%CrI: 0.056 - 0.23)

Tau2: 0.0284 (95%CrI: 0.00317 – 0.0508); I<sup>2</sup>=12%.

Helmet: helmet noninvasive ventilation, Face mask: face mask noninvasive ventilation.

Cumulative incidence of mortality in standard oxygen arm: 30%.

Panel A. Face mask vs. Standard oxygen (for mortality)

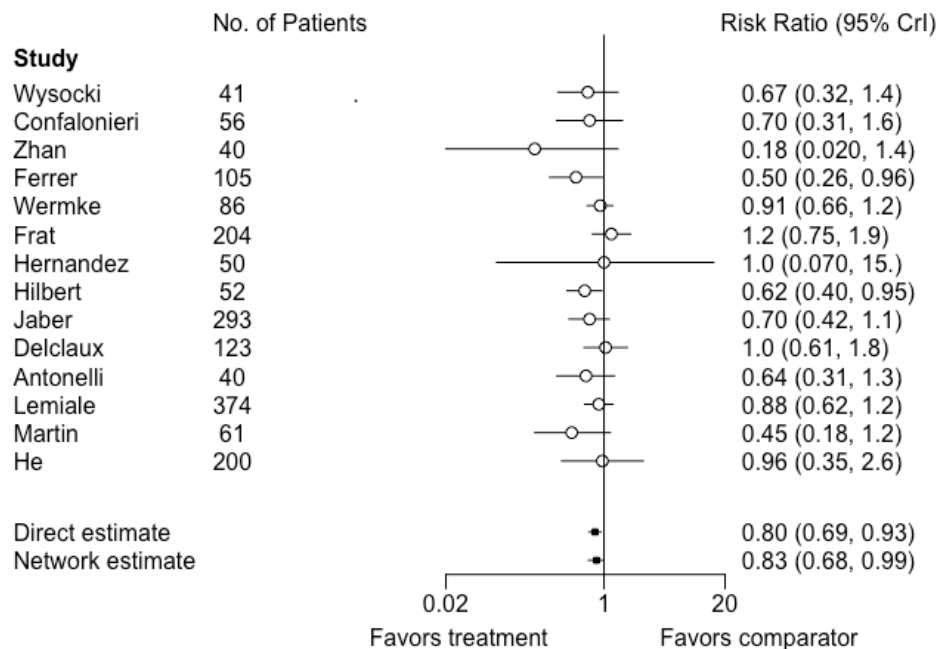

Panel B. High flow vs. Standard Oxygen (for mortality)

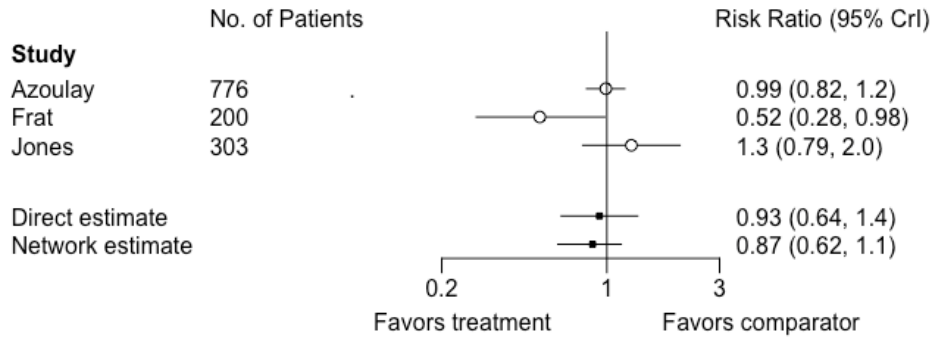

Panel C. Helmet vs. Standard Oxygen (for mortality)

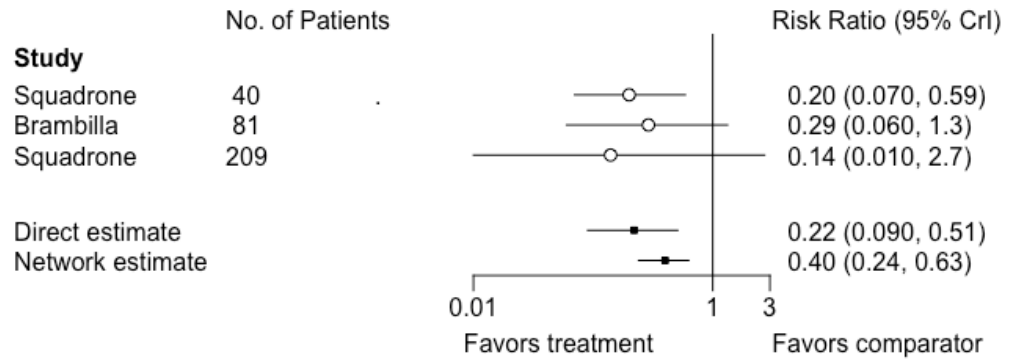

Panel D. High flow vs. Face mask (for mortality)

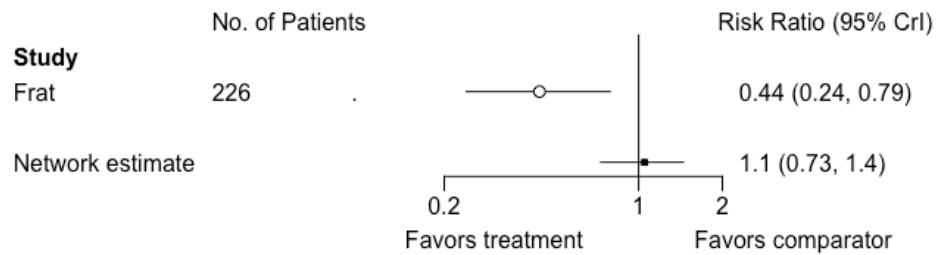

Panel E. Helmet vs. Face mask (for mortality)

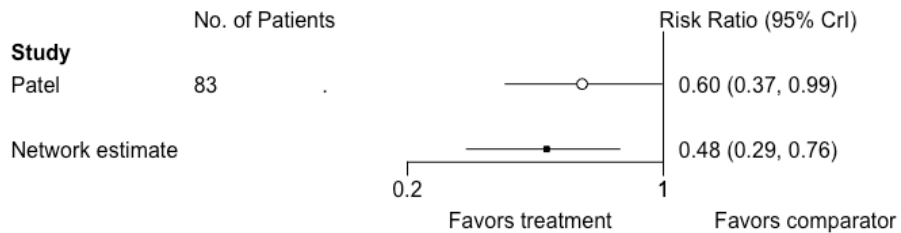

eFigure 3. Results of incoherence assessment for all-cause mortality<sup>1</sup>

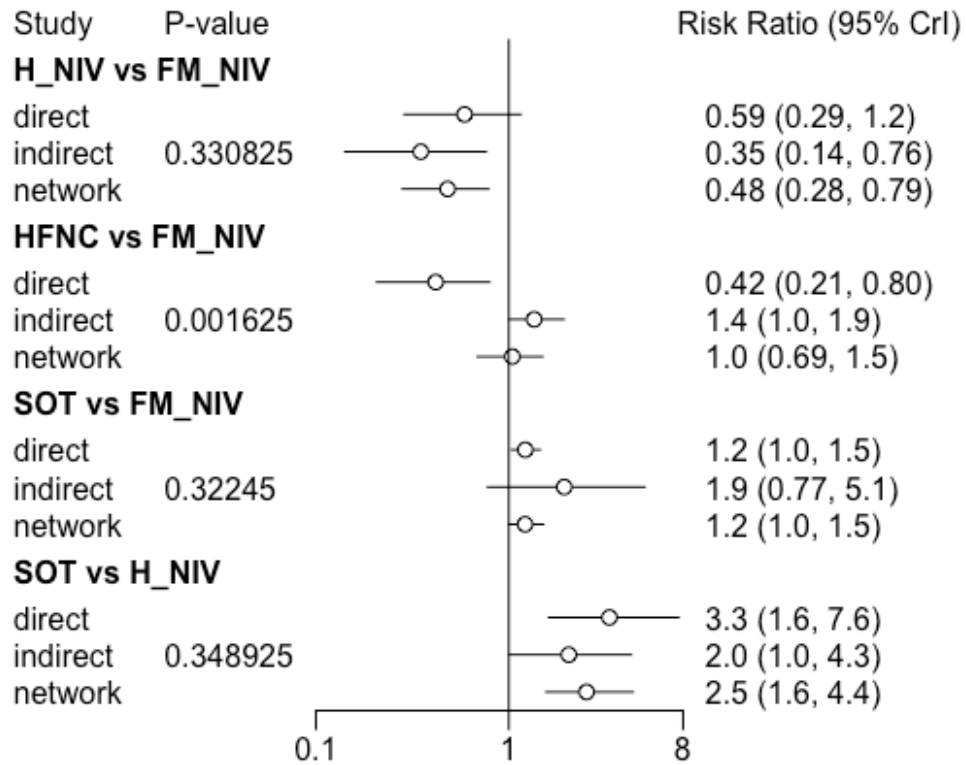

H\_NIV: helmet noninvasive ventilation, FM\_NIV: face mask noninvasive ventilation, HFNC: high-flow nasal oxygen, SOT: standard oxygen therapy.

1. The node split analysis does not include the comparison between high flow nasal oxygen and standard oxygen given that there was not enough indirect evidence to derive a precise estimate for the outcome of mortality.

**eFigure 4.** Rank probabilities for each treatment strategy to decrease the risk of all-cause mortality.

|        | Rank 1 | Rank 2 | Rank 3 | Rank 4 |
|--------|--------|--------|--------|--------|
| FM_NIV | 0.1    | 61.2   | 37.2   | 1.5    |
| H_NIV  | 99.6   | 0.4    | 0.0    | 0.0    |
| HFNC   | 0.4    | 38.0   | 46.9   | 14.6   |
| SOT    | 0.0    | 0.4    | 15.8   | 83.9   |

H\_NIV: helmet noninvasive ventilation, FM\_NIV: face mask noninvasive ventilation  
HFNC: high-flow nasal oxygen, SOT: standard oxygen therapy.



**eTable 2.** Summary of evidence grading for all comparison and primary and secondary outcome.

|        |      | All-cause mortality |          |                  | Intubation |          |                  |
|--------|------|---------------------|----------|------------------|------------|----------|------------------|
|        |      | Direct              | Indirect | NMA              | Direct     | Indirect | NMA              |
| Helmet | SOT  | Low                 | Low      | Low              | Low        | Low      | Low              |
| Helmet | FM   | Low                 | Low      | Low              | Low        | Low      | Low              |
| Helmet | HFNC | N/A                 | Low      | Low              | N/A        | Low      | Low              |
| FM     | SOT  | Moderate            | Low      | Moderate         | Low        | Moderate | Moderate         |
| HFNC   | SOT  | Low                 | Moderate | Moderate         | Moderate   | Low      | Moderate         |
| HFNC   | FM   | High                | Low      | Low <sup>1</sup> | Moderate   | Low      | Low <sup>1</sup> |

N/A: not available (e.g., no direct comparison). Helmet: helmet noninvasive ventilation, FM: face mask noninvasive ventilation, SOT: standard oxygen therapy, HFNC: high-flow nasal oxygen.

1. Due to incoherence

**eTable 3.** Individual study risk of bias for endotracheal intubation

| Name (year)         | Randomization generation | Allocation concealment | Blinding | Incomplete data | Selective reporting | Other | Overall risk of bias |
|---------------------|--------------------------|------------------------|----------|-----------------|---------------------|-------|----------------------|
| Wysocki (1995)      | LOW                      | LOW                    | HIGH     | LOW             | LOW                 | LOW   | UNCLEAR              |
| Confalonieri (1999) | LOW                      | LOW                    | HIGH     | LOW             | LOW                 | LOW   | UNCLEAR              |
| Squadrone (2010)    | LOW                      | LOW                    | HIGH     | LOW             | LOW                 | LOW   | UNCLEAR              |
| Brambilla (2014)    | PL                       | PL                     | HIGH     | LOW             | LOW                 | LOW   | HIGH                 |
| Doshi (2018)        | LOW                      | LOW                    | HIGH     | PL              | LOW                 | LOW   | HIGH                 |
| Zhan (2012)         | LOW                      | LOW                    | HIGH     | LOW             | LOW                 | LOW   | UNCLEAR              |
| Lemiale (2015)      | LOW                      | LOW                    | HIGH     | LOW             | LOW                 | LOW   | UNCLEAR              |
| Azevedo (2015)      | PL                       | PL                     | HIGH     | PH              | PL                  | PL    | HIGH                 |
| Ferrer (1999)       | LOW                      | LOW                    | HIGH     | LOW             | LOW                 | LOW   | UNCLEAR              |
| Azoulay (2018)      | LOW                      | LOW                    | HIGH     | LOW             | LOW                 | LOW   | UNCLEAR              |
| Bell (2015)         | LOW                      | LOW                    | HIGH     | LOW             | LOW                 | LOW   | UNCLEAR              |
| Wermcke (2011)      | LOW                      | LOW                    | HIGH     | PL              | LOW                 | LOW   | HIGH                 |
| Frat (2015)         | LOW                      | LOW                    | HIGH     | LOW             | LOW                 | LOW   | UNCLEAR              |
| Hernandez (2010)    | LOW                      | LOW                    | HIGH     | LOW             | LOW                 | LOW   | UNCLEAR              |
| Hilbert (2001)      | LOW                      | LOW                    | HIGH     | LOW             | LOW                 | LOW   | UNCLEAR              |
| Jaber (2016)        | LOW                      | LOW                    | HIGH     | LOW             | LOW                 | LOW   | UNCLEAR              |
| Delclaux (2000)     | LOW                      | LOW                    | HIGH     | LOW             | LOW                 | LOW   | UNCLEAR              |
| Squadrone (2005)    | LOW                      | LOW                    | HIGH     | LOW             | LOW                 | LOW   | UNCLEAR              |
| Antonelli (2000)    | LOW                      | LOW                    | HIGH     | LOW             | LOW                 | LOW   | UNCLEAR              |
| Jones (2016)        | LOW                      | LOW                    | HIGH     | PH              | LOW                 | LOW   | HIGH                 |
| Lemiale (2015)      | LOW                      | LOW                    | HIGH     | LOW             | LOW                 | LOW   | UNCLEAR              |
| Martin (2000)       | PL                       | PL                     | HIGH     | LOW             | LOW                 | LOW   | HIGH                 |
| Patel (2016)        | LOW                      | LOW                    | HIGH     | LOW             | LOW                 | LOW   | UNCLEAR              |
| Cosentini (2010)    | LOW                      | LOW                    | HIGH     | LOW             | LOW                 | LOW   | UNCLEAR              |
| He (2019)           | LOW                      | LOW                    | HIGH     | LOW             | HIGH                | LOW   | HIGH                 |

PL: probably low, PH: probably high

**eFigure 5.** Estimated association of different comparisons with endotracheal intubation risk at longest available follow-up up to 30 days

| Comparison                                 | Network Relative Risk (95% Credible Interval) | Network Risk difference (95% Credible Interval) | Number of trials and participants in direct comparison | Quality of Evidence <sup>a</sup> |
|--------------------------------------------|-----------------------------------------------|-------------------------------------------------|--------------------------------------------------------|----------------------------------|
| Helmet vs. Standard Oxygen                 | 0.26 (0.14 – 0.46)                            | -0.32 (-0.60 to -0.16)                          | 3 trials, 330 patients                                 | Low                              |
| Face mask vs. Standard Oxygen              | 0.76 (0.62 – 0.90)                            | -0.12 (-0.25 to -0.05)                          | 14 trials, 1725 patients                               | Moderate                         |
| High-flow nasal oxygen vs. Standard Oxygen | 0.76 (0.55 – 0.99)                            | -0.11 (-0.27 to -0.01)                          | 5 trials, 1479 patients                                | Moderate                         |
| Helmet vs. High-flow nasal oxygen          | 0.35 (0.18 – 0.66)                            | -0.20 (-0.43 to -0.08)                          | No head to head comparison                             | Low                              |
| Helmet vs. Face mask                       | 0.35 (0.19 – 0.61)                            | -0.20 (-0.40 to -0.09)                          | 1 trial, 83 patients                                   | Low                              |
| Face mask vs. High-flow nasal oxygen       | 1.01 (0.74 – 1.38)                            | 0.00 (-0.13 to 0.10)                            | 3 trials, 450 patients                                 | Low                              |

a. Based on GRADE criteria

Tau: 0.21 (95%CrI: 0.07 - 0.27)

Tau2: 0.0437 (95% CrI: 0.00554 – 0.0743), I2=15%.

Helmet: helmet noninvasive ventilation, Face mask: face mask noninvasive ventilation.

Cumulative incidence of intubation in standard oxygen arm: 40%

Panel A. Face mask vs. Standard Oxygen (for intubation)

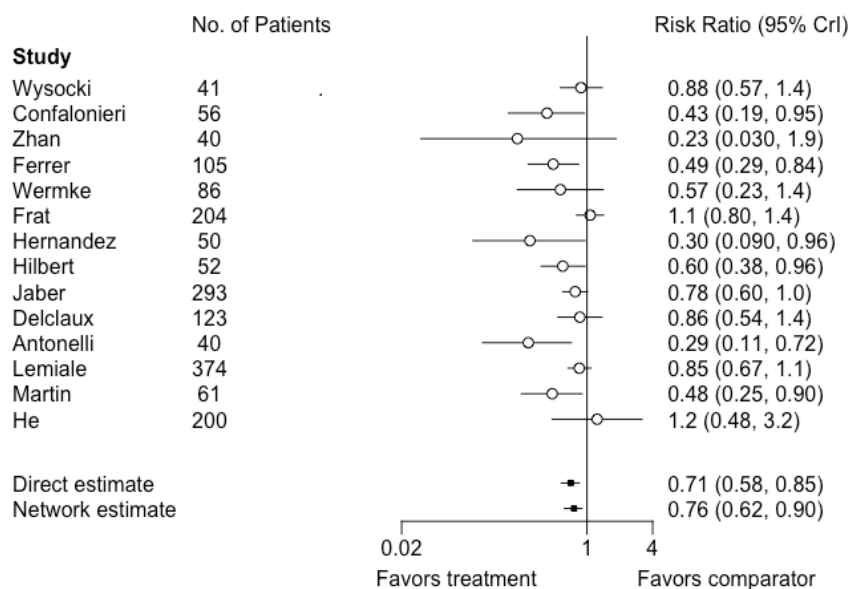

Panel B. High flow vs. Standard Oxygen (for intubation)

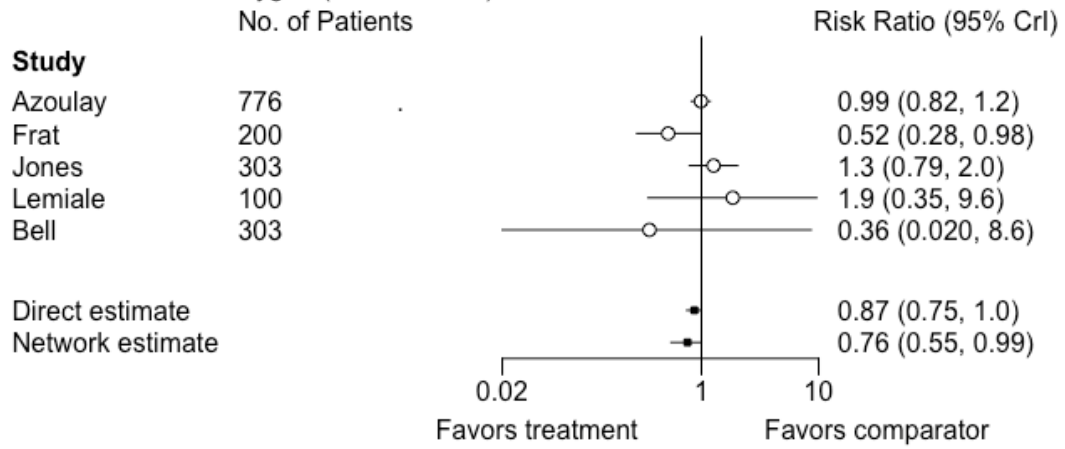

Panel C. Helmet vs. Standard Oxygen (for intubation)

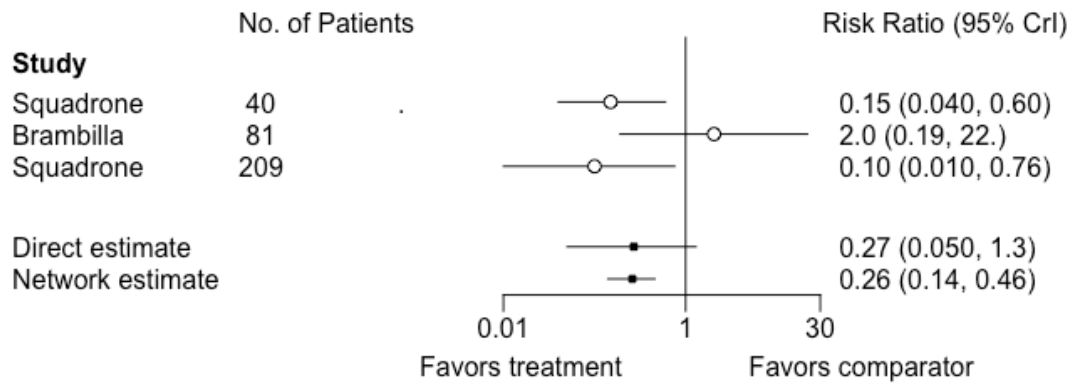

Panel D. High flow vs. Face mask (for intubation)

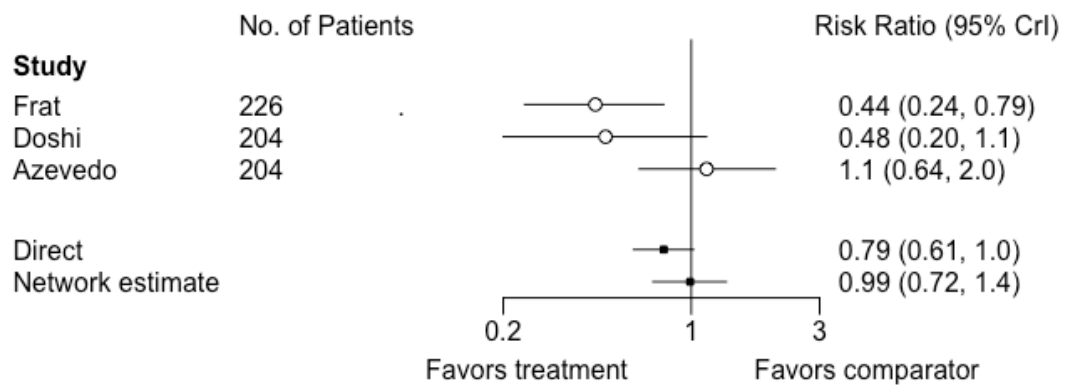

Panel E. Helmet vs. Face mask (for intubation)

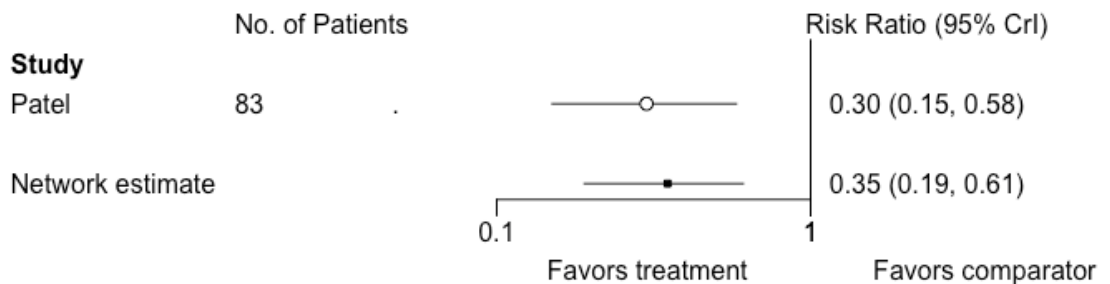

**eFigure 6.** Results of incoherence assessment for endotracheal intubation (node-splitting models)

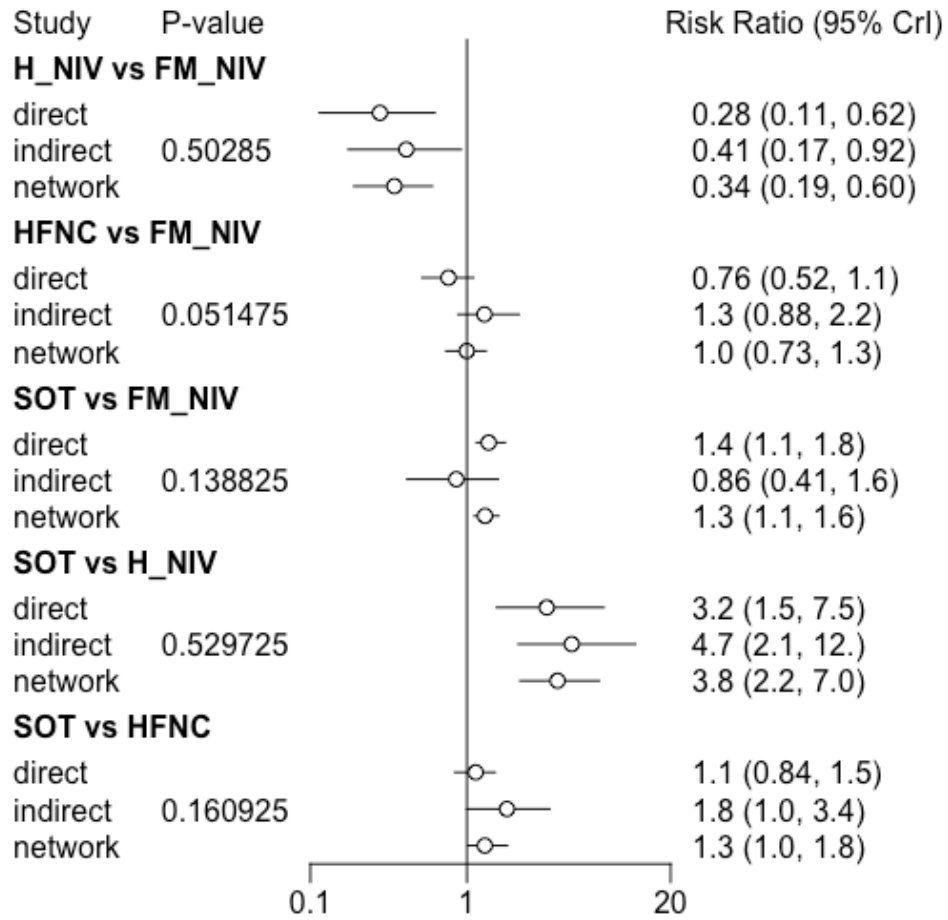

H\_NIV: helmet noninvasive ventilation, FM\_NIV: face mask noninvasive ventilation, HFNC: high-flow nasal oxygen, SOT: standard oxygen therapy.

**eFigure 7.** Potential sources of incoherence  
 Node-splitting analysis (for intubation)<sup>1</sup> excluding the study by Frat et. al.

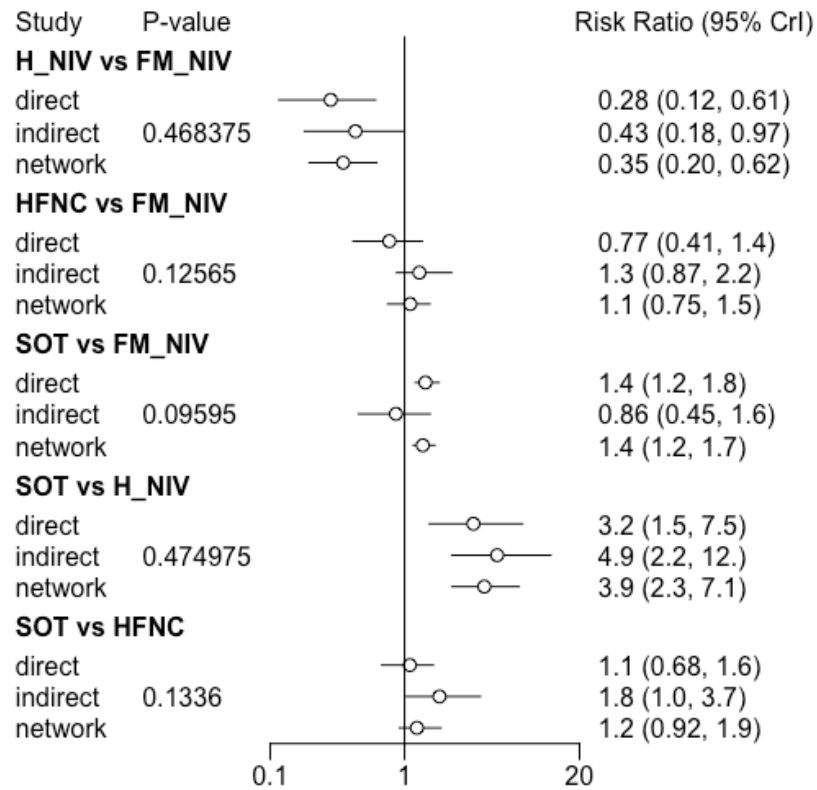

1. Not done for all-cause mortality since no other FM\_NIV HFNC direct comparisons available.  
 H\_NIV: helmet noninvasive ventilation, FM\_NIV: face mask noninvasive ventilation, HFNC: high-flow nasal oxygen, SOT: standard oxygen therapy.  
 Model fit - DIC: 82.2, Residual Deviance: 52.8, 46 data points.

Node-splitting analysis (for intubation and mortality) excluding studies with at least one patient with COPD or CHF.

Mortality

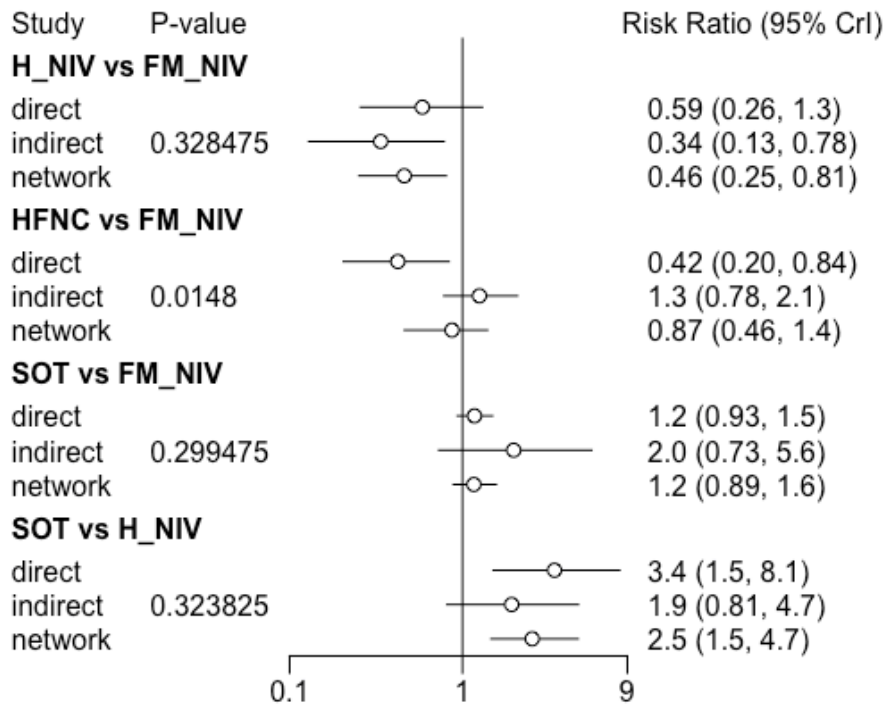

Intubation

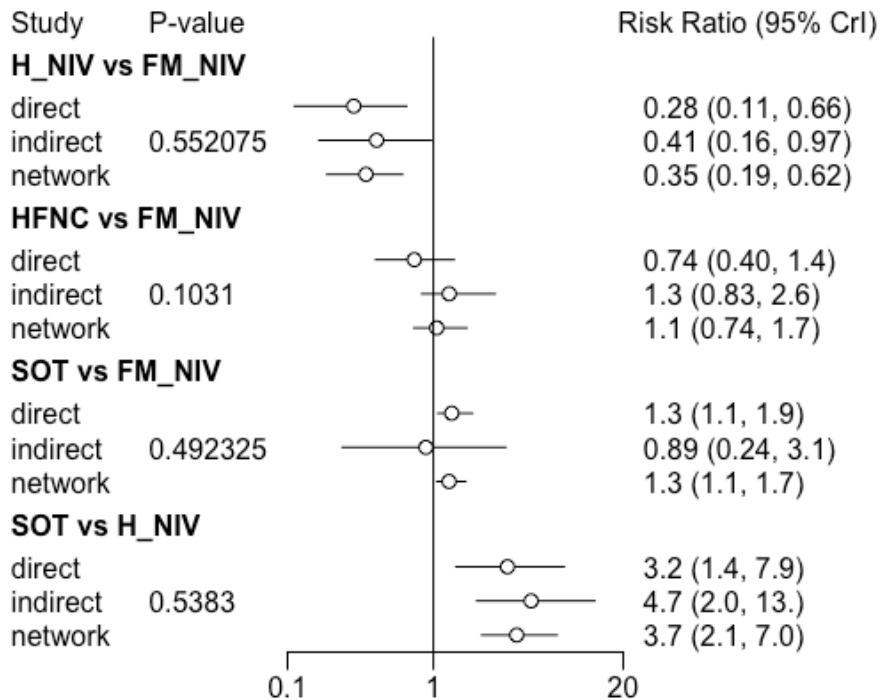

Node-splitting analysis (for intubation and mortality) excluding studies with high risk of bias.

Mortality

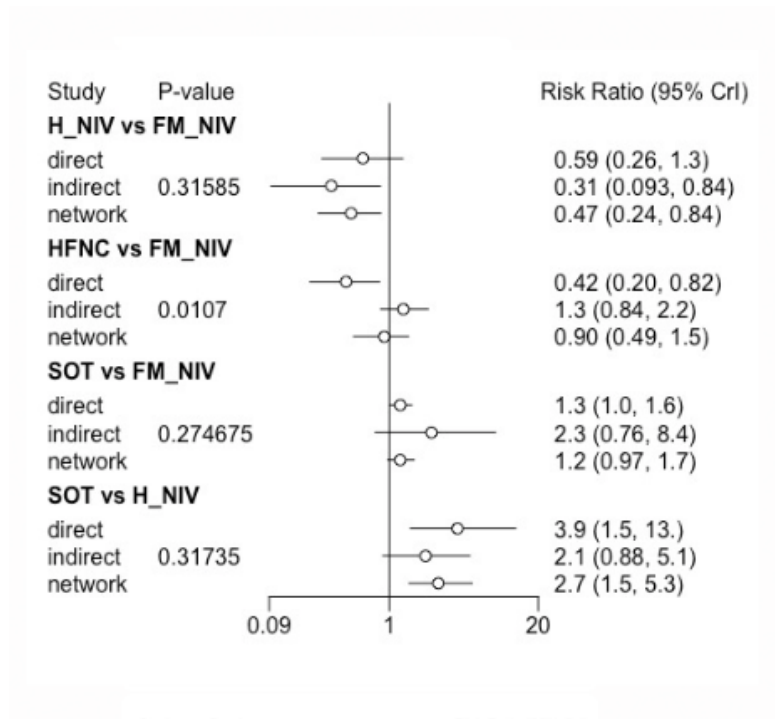

Intubation

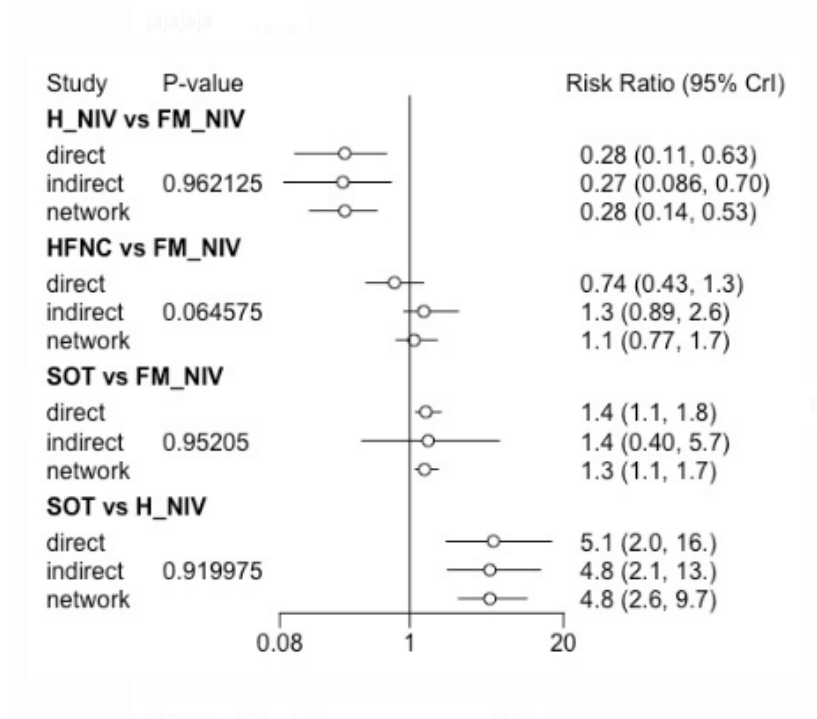



**eFigure 8.** Rank probabilities for each treatment strategy to decrease the risk of endotracheal intubation.

|        | Rank 1 | Rank 2 | Rank 3 | Rank 4 |
|--------|--------|--------|--------|--------|
| FM_NIV | 0.0    | 48.3   | 51.6   | 0.1    |
| H_NIV  | 99.9   | 0.1    | 0.0    | 0.0    |
| HFNC   | 0.1    | 51.6   | 45.9   | 2.4    |
| SOT    | 0.0    | 0.0    | 2.5    | 97.5   |

H\_NIV: helmet noninvasive ventilation, FM\_NIV: face mask noninvasive ventilation  
HFNC: high-flow nasal oxygen, SOT: standard oxygen therapy.

eFigure 9. Gelman plots for model convergence for all-cause mortality

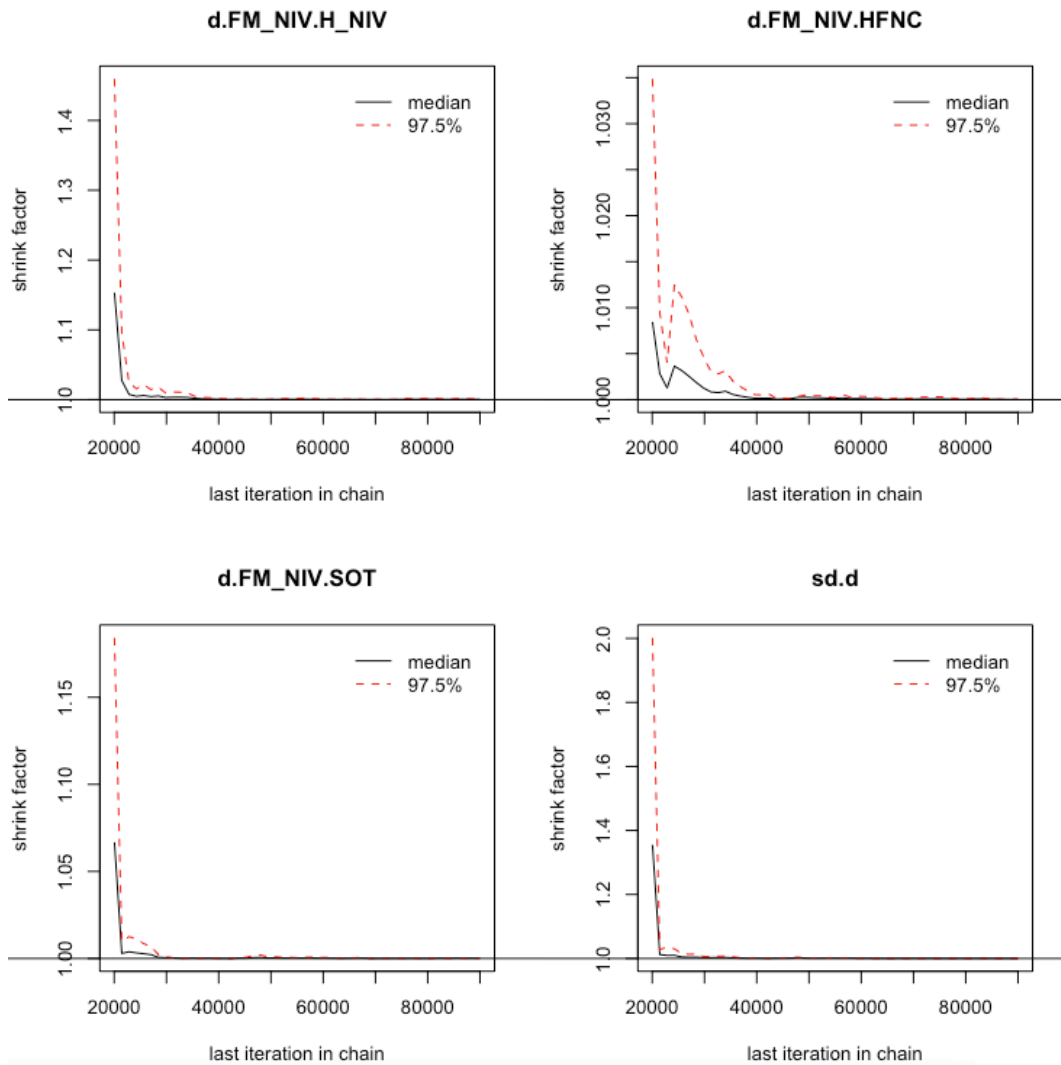

H\_NIV: helmet noninvasive ventilation, FM\_NIV: face mask noninvasive ventilation, HFNC: high-flow nasal oxygen, SOT: standard oxygen therapy.

eFigure 10. Gelman plots for model convergence for endotracheal intubation

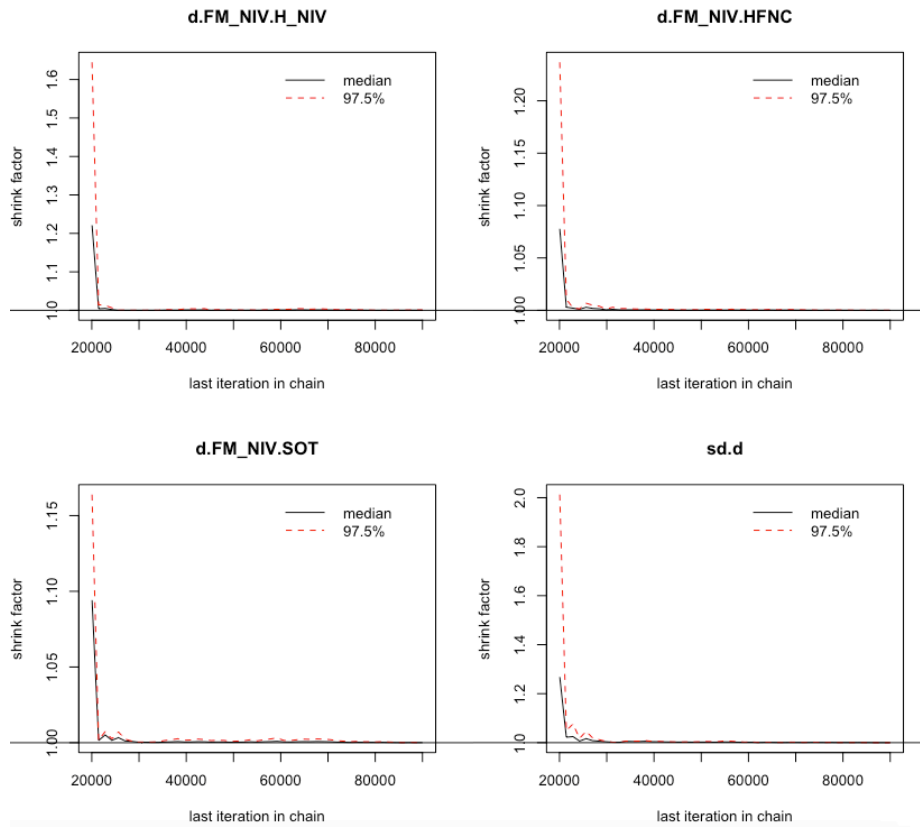

H\_NIV: helmet noninvasive ventilation, FM\_NIV: face mask noninvasive ventilation, HFNC: high-flow nasal oxygen, SOT: standard oxygen therapy.

**eTable 4.** Assessment of model fit for primary and secondary outcome

Mortality

| <u>Model fit characteristic</u> |      |
|---------------------------------|------|
| Residual deviance               | 45.2 |
| Leverage                        | 26.3 |
| Deviance information criterion  | 71.5 |
| Number of data points           | 41   |

Intubation

| <u>Model fit characteristic</u> |      |
|---------------------------------|------|
| Residual deviance               | 56.5 |
| Leverage                        | 32.1 |
| Deviance information criterion  | 88.6 |
| Number of data points           | 49   |

**eTable 5.** Median length of stay by treatment group<sup>1</sup>

| Treatment group                   | ICU length of stay, days (95% Credible Interval) | Hospital length of stay, days (95% Credible Interval) |
|-----------------------------------|--------------------------------------------------|-------------------------------------------------------|
| Standard oxygen                   | 8.3 (6.1 – 10.6)                                 | 18.8 (14.3 – 23.3)                                    |
| High-flow nasal oxygen            | 7.5 (2.5 – 15.2)                                 | 16.6 (8.5 – 22.2)                                     |
| Face mask noninvasive ventilation | 7.0 (4.5 – 10.2)                                 | 16.5 (11.4 – 20.6)                                    |
| Helmet noninvasive ventilation    | 7.2 (2.0 – 14.0)                                 | 15.6 (11.5 – 21.1)                                    |

1. No significant difference was observed between groups. Based on a network metaanalysis for continuous outcomes using pnetmeta package.

ICU LOS data available for: Antonelli, Azoulay, Confalonieri, Cosentini, Doshi, Ferrer, Hernandez, Hilbert, Jaber, Lemiale 2015, Patel, Squadrone 2005, Wysocki, Zhan.

Hospital LOS data available for: Azoulay, Brambilla, Confalonieri, Cosentini, Doshi, Ferrer, Hernandez, Jaber, Jones, Lemiale 2015, Patel, Squadrone 2005, Zhan.

ICU: intensive care unit.

**eTable 6.** Summary of sensitivity analysis for the association of all interventions (versus standard oxygen) with all-cause mortality

| Type of Analysis                              | Helmet vs SOT    | Face Mask vs SOT | High-flow vs SOT |
|-----------------------------------------------|------------------|------------------|------------------|
| All patients – Main analysis                  | 0.40 (0.24-0.63) | 0.83 (0.68-0.99) | 0.87 (0.62-1.15) |
| Non-informative priors for tau                | 0.39 (0.22-0.64) | 0.82 (0.66-1.00) | 0.86 (0.58-1.18) |
| Immunocompromised patients                    | 0.38 (0.22-0.61) | 0.78 (0.61-0.97) | 0.99 (0.67-1.46) |
| Mean P/F Ratio < 200                          | 0.47 (0.25-0.88) | 0.83 (0.65-1.04) | 0.76 (0.47-1.08) |
| Excluding studies with CHF/AECOPD patients    | 0.40 (0.24-0.65) | 0.86 (0.68-1.09) | 0.77 (0.48-1.08) |
| Excluding studies with postoperative patients | 0.40 (0.24-0.65) | 0.84 (0.68-1.01) | 0.86 (0.61-1.15) |
| In-hospital mortality                         | 0.37 (0.21-0.61) | 0.83 (0.67-1.03) | 0.86 (0.59-1.16) |
| Including studies with low risk of bias       | 0.38 (0.21-0.65) | 0.81 (0.64-0.99) | 0.76 (0.47-1.07) |

Face mask: face mask non-invasive ventilation, Helmet: helmet non-invasive ventilation, high flow: high-flow nasal oxygen, SOT: standard oxygen therapy, P/F ratio: PaO<sub>2</sub> / FiO<sub>2</sub> ratio, CHF: congestive heart failure, AECOPD: acute exacerbation of chronic obstructive pulmonary disease.

**eTable 7.** Summary of sensitivity analysis for the association of all interventions (versus standard oxygen) with endotracheal intubation

| Type of Analysis                              | Helmet vs SOT    | Face Mask vs SOT | High-flow vs SOT |
|-----------------------------------------------|------------------|------------------|------------------|
| All patients – Main analysis                  | 0.26 (0.14-0.46) | 0.76 (0.62-0.90) | 0.76 (0.55-0.99) |
| Non-informative priors for tau                | 0.26 (0.14-0.46) | 0.77 (0.62-0.90) | 0.77 (0.55-0.99) |
| Immunocompromised patients                    | 0.20 (0.10-0.38) | 0.70 (0.49-0.93) | 0.95 (0.59-1.84) |
| Mean P/F Ratio < 200                          | 0.30 (0.13-0.73) | 0.72 (0.55-0.90) | 0.81 (0.54-1.28) |
| Excluding studies with CHF/AECOPD patients    | 0.26 (0.14-0.47) | 0.77 (0.60-0.95) | 0.82 (0.58-1.21) |
| Excluding studies with postoperative patients | 0.27 (0.14-0.52) | 0.74 (0.59-0.90) | 0.74 (0.52-1.01) |
| Including studies with low risk of bias       | 0.21 (0.10-0.39) | 0.74 (0.58-0.90) | 0.81 (0.57-1.18) |

Face mask: face mask non-invasive ventilation, Helmet: helmet non-invasive ventilation, High flow: high-flow nasal oxygen, SOT: standard oxygen therapy, P/F ratio: PaO<sub>2</sub> / FiO<sub>2</sub> ratio, CHF: congestive heart failure, AECOPD: acute exacerbation of chronic obstructive pulmonary disease.

**eTable 8** Sensitivity analysis with informative priors<sup>1</sup> for all-cause mortality.

|                                             | <i>Non-informative priors<br/>(main analysis)</i> | <i>Informative priors<sup>2</sup></i>            |
|---------------------------------------------|---------------------------------------------------|--------------------------------------------------|
| <b>Comparison</b>                           | <b>Relative Risk<br/>(95% Credible Interval)</b>  | <b>Relative Risk<br/>(95% Credible Interval)</b> |
| Face mask vs. Helmet                        | 2.09 (1.32 – 3.44)                                | 2.24 (1.34 – 4.05)                               |
| Face mask vs. High flow nasal cannula       | 0.95 (0.69 – 1.37)                                | 1.23 (0.91 – 1.82)                               |
| Face mask vs. Standard Oxygen               | 0.83 (0.68 – 0.99)                                | 0.93 (0.77 – 1.14)                               |
| Helmet vs. High flow nasal cannula          | 0.46 (0.26 – 0.80)                                | 0.55 (0.30– 1.04)                                |
| Helmet vs. Standard Oxygen                  | 0.40 (0.24 – 0.63)                                | 0.41 (0.23 – 0.70)                               |
| High flow nasal cannula vs. Standard Oxygen | 0.87 (0.62 – 1.15)                                | 0.76 (0.52 – 1.01)                               |

1. Based on data from Bellami et al, Frat et al, Golligher et al.

2. Strongly optimistic for high-flow nasal oxygen and pessimistic for face mask noninvasive ventilation.



**eTable 9.** Sensitivity analysis with informative priors<sup>1</sup> for intubation.

|                                             | <i>Non-informative priors<br/>(main analysis)</i> | <i>Informative priors<sup>2</sup></i>            |
|---------------------------------------------|---------------------------------------------------|--------------------------------------------------|
| <b>Comparison</b>                           | <b>Relative Risk<br/>(95% Credible Interval)</b>  | <b>Relative Risk<br/>(95% Credible Interval)</b> |
| Face mask vs. Helmet                        | 2.92 (1.64 – 5.35)                                | 3.06 (1.74 – 5.62)                               |
| Face mask vs. High flow nasal cannula       | 1.01 (0.74 – 1.38)                                | 1.16 (0.92 – 1.61)                               |
| Face mask vs. Standard Oxygen               | 0.76 (0.62 – 0.90)                                | 0.84 (0.71 – 1.01)                               |
| Helmet vs. High flow nasal cannula          | 0.35 (0.18 – 0.66)                                | 0.38 (0.20 – 0.74)                               |
| Helmet vs. Standard Oxygen                  | 0.26 (0.14 – 0.46)                                | 0.27 (0.15 – 0.49)                               |
| High flow nasal cannula vs. Standard Oxygen | 0.76 (0.55 – 0.99)                                | 0.72 (0.52 – 0.91)                               |

1. Based on data from Bellami et al, Frat et al, Golligher et al.

2. Strongly optimistic for high-flow nasal oxygen and pessimistic for face mask noninvasive ventilation.

## eReferences

1. Dias S, Sutton AJ, Ades AE, Welton NJ. Evidence synthesis for decision making 2: A generalized linear modeling framework for pairwise and network meta-analysis of randomized controlled trials. *Med Decis Mak*. 2013;33(5):607-617. doi:10.1177/0272989X12458724
2. Warn DE, Thompson SG, Spiegelhalter DJ. Bayesian random effects meta-analysis of trials with binary outcomes: methods for the absolute risk difference and relative risk scales. *Stat Med*. 2002;21(11):1601-1623. doi:10.1002/sim.1189
3. Franchini AJ, Dias S, Ades AE, Jansen JP, Welton NJ. Accounting for correlation in network meta-analysis with multi-arm trials. *Res Synth Methods*. 2012;3(2):142-160. doi:10.1002/jrsm.1049
4. Spiegelhalter DJ, Best NG, Carlin BP, van der Linde A. Bayesian measures of model complexity and fit. *J R Stat Soc Ser B (Statistical Methodol)*. 2002;64(4):583-639. doi:10.1111/1467-9868.00353
5. Bellani G, Laffey JG, Pham T, et al. Epidemiology, Patterns of Care, and Mortality for Patients With Acute Respiratory Distress Syndrome in Intensive Care Units in 50 Countries. *JAMA*. 2016;315(8):788. doi:10.1001/jama.2016.0291
6. Frat JP, Thille AW, Mercat A, et al. High-flow oxygen through nasal cannula in acute hypoxemic respiratory failure. *N Engl J Med*. 2015;372(23):2185-2196. doi:10.1056/NEJMoa1503326
7. Salanti G, Ades AE, Ioannidis JPA. Graphical methods and numerical summaries for presenting results from multiple-treatment meta-analysis: An overview and tutorial. *J Clin Epidemiol*. 2011;64(2):163-171. doi:10.1016/j.jclinepi.2010.03.016
8. Higgins JPT, Jackson D, Barrett JK, Lu G, Ades AE, White IR. Consistency and inconsistency in network meta-analysis: concepts and models for multi-arm studies. *Res Synth Methods*. 2012;3(2):98-110. doi:10.1002/jrsm.1044
9. van Valkenhoef G, Dias S, Ades AE, Welton NJ. Automated generation of node-splitting models for assessment of inconsistency in network meta-analysis. *Res Synth Methods*. 2016;7(1):80-93. doi:10.1002/jrsm.1167
10. Turner RM, Jackson D, Wei Y, Thompson SG, Higgins JPT. Predictive distributions for between-study heterogeneity and simple methods for their application in Bayesian meta-analysis. *Stat Med*. 2015;34(6):984-998. doi:10.1002/sim.6381
11. Goligher EC, Tomlinson G, Hajage D, et al. Extracorporeal Membrane Oxygenation for Severe Acute Respiratory Distress Syndrome and Posterior Probability of Mortality Benefit in a Post Hoc Bayesian Analysis of a Randomized Clinical Trial. *JAMA - J Am Med Assoc*. 2018;320(21):2251-2259. doi:10.1001/jama.2018.14276
